# Supplementary material for: Synthesis of 1,3,5-triazines via Cu(OAc)2-catalyzed aerobic oxidative coupling of alcohols and amidine hydrochlorides
Source: Royal Society of Chemistry journal article supplement (doi:10.1039/c5ob00724k), 2015-01-01
Supplement: c5ob00724k1.pdf [file c5ob00724k1.pdf]

## Supporting Information

### Synthesis of 1,3,5-Triazines via Cu(OAc)<sub>2</sub>-Catalyzed Aerobic Oxidative Coupling of Alcohols and Amidine hydrochlorides

Qing You, Fei Wang, Chaoting Wu, Tianchao Shi, Dewen Min, Huajun Chen,  
Wu Zhang\*

Key Laboratory of Functional Molecular Solids, Ministry of Education, Anhui  
Laboratory of Molecule-Based Materials, College of Chemistry and Materials Science,  
Anhui Normal University, Wuhu 241000, China. E-mail: zhangwu@mail.ahnu.edu.cn

### Content

|                                                                     |        |
|---------------------------------------------------------------------|--------|
| Typical Experimental Procedure.....                                 | S2     |
| Characterization data for the products.....                         | S3-S8  |
| <sup>1</sup> H and <sup>13</sup> C NMR spectra of the products..... | S9-S41 |
| References.....                                                     | S42    |

## Typical Experimental Procedure

### (A) Remarks

All starting materials and reagents were commercially available and used directly without further purification. All known products gave satisfactory analytical data by NMR spectra, which corresponding to the reported literature values. Unknown compounds were confirmed by HRMS additionally. NMR spectra were determined at room temperature on Bruker Avance-300 or Bruker Avance-500 at 300 MHz or 500 MHz with tetramethylsilane (TMS) as an internal standard. Chemical shifts are given in  $\delta$  relative to TMS, the coupling constants  $J$  are given in Hz. High-resolution mass spectral (HRMS) were obtained using APCI, ESI or EI in positive mode.

### (B) Typical experimental procedure for the synthesis of **3**

A mixture of alcohol **1** (0.6 mmol), amidine hydrochloride **2** (1.0 mmol), NaCO<sub>3</sub> (1.0 mmol, 1.0 equiv) and Cu(OAc)<sub>2</sub> (10 mol %) was stirred in toluene (2.5 mL) under reflux in air for 24 h. The resulting mixture was cooled to room temperature and then extracted it for several times with EtOAc (10 mL) and brine (5 mL). The organic phases were combined and dried with anhydrous Na<sub>2</sub>SO<sub>4</sub> and evaporated under vacuum. The crude product was purified by column chromatography on silica gel using petroleum ether/EtOAc (100:1) as an eluent to give the corresponding products **3aa–3rb**.

## Characterization data for the products

### **2,4,6-triphenyl-1,3,5-triazine<sup>1</sup> (3aa)**

White solid; yield 88%; m.p.237-239 °C; Lit.m.p:233-234 °C; <sup>1</sup>H NMR (300MHz, CDCl<sub>3</sub>) δ 8.80-8.78(m, 6H), 7.65-7.56(m, 9H); <sup>13</sup>C NMR (75 MHz, d<sup>6</sup>-DMSO) δ 166.6, 134.6, 129.8, 128.9.

### **2-(4-chlorophenyl)-4,6-diphenyl-1,3,5-triazine<sup>1</sup> (3ba)**

White solid; yield 88%; m.p.198-199 °C; Lit.m.p:199-200 °C; <sup>1</sup>H NMR (300 MHz, CDCl<sub>3</sub>) δ 8.74-8.66(m, 6H), 7.59-7.50(m, 8H); <sup>13</sup>C NMR (75 MHz, CDCl<sub>3</sub>) δ 172.0, 171.0, 139.1, 136.4, 135.1, 133.0, 130.6, 129.3, 129.3, 129.0.

### **2-(2-chlorophenyl)-4,6-diphenyl-1,3,5-triazine<sup>2</sup> (3ca)**

White solid; yield 85%; m.p.135-136 °C; Lit.m.p:130-133 °C; <sup>1</sup>H NMR (300 MHz, CDCl<sub>3</sub>) δ 8.76(d, *J* = 6.6 Hz, 4H), 8.18-8.15(m, 1H), 7.65-7.54(m, 7H), 7.51-7.44(m, 2H); <sup>13</sup>C NMR (125 MHz, CDCl<sub>3</sub>) δ 173.2, 172.0, 136.4, 136.3, 134.2, 133.1, 132.8, 132.0, 131.7, 129.5, 129.1, 127.3.

### **2-(3-chlorophenyl)-4,6-diphenyl-1,3,5-triazine<sup>3</sup> (3da)**

White solid; yield 55%; m.p.195-197 °C; Lit.m.p:194-195 °C; <sup>1</sup>H NMR (300MHz, CDCl<sub>3</sub>) δ 8.79-8.74(m, 5H), 8.67(d, *J* = 7.8 Hz, 1H), 7.66-7.49(m, 8H); <sup>13</sup>C NMR (75MHz, CDCl<sub>3</sub>) δ 172.2, 171.0, 138.5, 136.3, 135.2, 133.1, 132.8, 130.3, 129.4, 129.3, 129.1, 127.4.

### **2,4-diphenyl-6-(p-tolyl)-1,3,5-triazine<sup>4</sup> (3ea)**

Yellow solid; yield 88%; m.p.196-197 °C; Lit.m.p:197-199 °C; <sup>1</sup>H NMR (300 MHz, CDCl<sub>3</sub>) δ 8.72(d, *J* = 6.0 Hz, 4H), 8.60(d, *J* = 7.8 Hz, 2H), 7.53 (d, *J* = 6.6 Hz, 6H), 7.3(d, *J* = 7.8 Hz, 2H), 2.40(s, 3H); <sup>13</sup>C NMR (75 MHz, CDCl<sub>3</sub>) δ 171.9, 171.8, 143.5, 136.7, 133.9, 132.8, 129.8, 129.3, 129.0, 22.2.

### **2,4-diphenyl-6-(o-tolyl)-1,3,5-triazine<sup>5</sup> (3fa)**

White solid; yield 47%; m.p.122-123 °C; Lit.m.p:121-122 °C; <sup>1</sup>H NMR (300 MHz, CDCl<sub>3</sub>) δ 8.76(d, *J* = 6.3Hz, 4H), 8.35(d, *J* = 7.2Hz, 1H), 7.64-7.56(m, 6H), 7.50-7.38(m, 3H), 2.87(s, 3H); <sup>13</sup>C NMR (75 MHz, CDCl<sub>3</sub>) δ 174.9, 171.7, 139.5, 136.6, 136.5, 132.9, 132.3, 131.7, 131.4, 129.4, 129.1, 126.5, 22.8.

**2,4-diphenyl-6-(m-tolyl)-1,3,5-triazine (3ga)**

White solid; yield 85%; m.p.167-168 °C; <sup>1</sup>H NMR (300 MHz, CDCl<sub>3</sub>) δ 8.80-8.77(m, 4H), 8.60-8.58(m, 2H), 7.65-7.56(m, 6H), 7.50-7.42(m, 2H), 2.53(s, 3H); <sup>13</sup>C NMR (75 MHz, CDCl<sub>3</sub>) δ 172.0, 169.4, 138.7, 136.6, 136.5, 133.7, 132.9, 129.8, 129.3, 129.0, 128.9, 126.6, 22.0. HRMS (EI) calcd for C<sub>22</sub>H<sub>17</sub>N<sub>3</sub> ([M]<sup>+</sup>) 323.1422, found 323.1430.

**2,4-diphenyl-6-(4-(trifluoromethyl)phenyl)-1,3,5-triazine (3ha)**

White solid; yield 87%; m.p.183-184 °C; <sup>1</sup>H NMR (300 MHz, CDCl<sub>3</sub>) δ 8.84(d, *J*=8.1 Hz, 2H), 8.76-8.73 (m, 4H), 7.81(d, *J* = 8.1 Hz, 2H), 7.66-7.55(m, 6H); <sup>13</sup>C NMR (125 MHz, CDCl<sub>3</sub>) δ 172.3, 170.8, 140.0, 136.3, 134.2(q, *J* = 32.3 Hz), 133.2, 129.6, 129.4, 129.1, 125.9(q, *J* = 3.5 Hz), 124.4(q, *J* = 270.8 Hz). HRMS (EI) calcd for C<sub>22</sub>H<sub>14</sub>F<sub>3</sub>N<sub>3</sub> ([M]<sup>+</sup>) 377.1140, found 377.1135.

**2-(4-methoxyphenyl)-4,6-diphenyl-1,3,5-triazine<sup>1</sup> (3ia)**

White solid; yield 90%; m.p.159-161 °C; Lit.m.p.:158-160 °C; <sup>1</sup>H NMR (300 MHz, CDCl<sub>3</sub>) δ 8.78-8.73(m, 6H), 7.64-7.54(m, 6H), 7.07(d, *J* = 8.7 Hz, 2H), 3.92(s, 3H); <sup>13</sup>C NMR (75 MHz, d<sup>6</sup>-DMSO) δ 171.5, 164.1, 136.3, 133.8, 131.5, 129.8, 129.4, 128.4, 115.2, 56.4.

**2-(4-bromophenyl)-4,6-diphenyl-1,3,5-triazine<sup>5</sup> (3ja)**

White solid; yield 52%; m.p.200-201 °C; Lit.m.p.:204-205 °C; <sup>1</sup>H NMR (300 MHz, CDCl<sub>3</sub>) δ 8.68(d, *J* = 8.1Hz, 2H), 8.60(d, *J* = 6.9Hz, 4H), 7.70(d, *J*=7.8Hz, 2H), 7.54-7.45(m, 6H); <sup>13</sup>C NMR (75MHz, CDCl<sub>3</sub>) δ 172.1, 171.2, 136.4, 135.5, 133.0, 132.3, 130.8,129.3, 129.0, 127.8.

**2-(4-nitrophenyl)-4,6-diphenyl-1,3,5-triazine<sup>1</sup> (3ka)**

Yellow solid; yield 46%; m.p.217-218 °C; Lit.m.p.:216-218 °C; <sup>1</sup>H NMR (300 MHz, CDCl<sub>3</sub>) δ 8.93(d, *J* = 8.7Hz, 2H), 8.78-8.75(m, 4H), 8.41(d, *J* = 9.0Hz, 2H), 7.68-7.57(m, 6H); <sup>13</sup>C NMR (75 MHz, CDCl<sub>3</sub>) δ 172.4, 170.3, 136.0, 133.4, 130.2, 129.4, 129.2, 124.1.

**2-(4-isopropylphenyl)-4,6-diphenyl-1,3,5-triazine<sup>6</sup> (3la)**

White solid; yield 92%; m.p.153-154 °C; Lit.m.p.:149-150 °C; <sup>1</sup>H NMR (300MHz,

CDCl<sub>3</sub>) δ 8.80-8.77 (m, 4H), 8.70(d, *J* = 8.1Hz, 2H), 7.65-7.55(m, 6H), 7.44(d, *J* = 8.1Hz, 2H), 3.11-2.98(m, 1H), 1.34(d, *J* = 6.9Hz, 2H); <sup>13</sup>C NMR(75MHz, CDCl<sub>3</sub>) δ 172.0, 171.9, 154.3, 136.7, 134.3, 132.8, 129.5, 129.3, 129.0, 127.2.

**2-(4-fluorophenyl)-4,6-diphenyl-1,3,5-triazine (3ma)**

White solid; yield 95%; m.p.248-249 °C; <sup>1</sup>H NMR (300 MHz, CDCl<sub>3</sub>) δ 8.82-8.75 (m, 6H), 7.64-7.56(m, 6H), 7.28-7.22(m, 2H); <sup>13</sup>C NMR (125 MHz, CDCl<sub>3</sub>) δ 172.1, 171.1, 166.2(d, *J* = 251.4 Hz), 136.5, 132.9, 132.8, 131.7(d, *J* = 9.0 Hz), 129.4, 129.0, 116.1(d, *J* = 21.6 Hz). HRMS (ESI) calcd for C<sub>21</sub>H<sub>14</sub>FN<sub>3</sub> ([M+H]<sup>+</sup>) 328.1250, found 328.1237.

**2-(2,4-dichlorophenyl)-4,6-diphenyl-1,3,5-triazine (3na)**

White solid; yield 90%; m.p.161-162 °C; <sup>1</sup>H NMR (300 MHz, CDCl<sub>3</sub>) δ 8.65(d, *J* = 6 Hz, 4H), 8.09(d, *J* = 8.1 Hz, 1H), 7.50(d, *J* = 7.2 Hz, 7H), 7.36(d, *J* = 8.1 Hz, 1H); <sup>13</sup>C NMR (75 MHz, CDCl<sub>3</sub>) δ 172.0, 137.6, 136.1, 135.2, 133.7, 133.2, 131.5, 129.5, 129.1, 127.6. HRMS (EI) calcd for C<sub>21</sub>H<sub>13</sub>Cl<sub>2</sub>N<sub>3</sub> ([M]<sup>+</sup>) 377.0486, found 377.0494.

**2,4-di-phenyl-6-(pyridin-2-yl)-1,3,5-triazine<sup>1</sup> (3oa)**

White solid; yield 97%; m.p.237-238 °C; Lit.m.p:230-231 °C; <sup>1</sup>H NMR (300 MHz, CDCl<sub>3</sub>) δ 8.97(d, *J* = 4.5 Hz, 1H), 8.81(d, *J* = 6.6Hz, 5H), 8.00-7.94(m, 1H), 7.66-7.51(m, 7H); <sup>13</sup>C NMR (75 MHz, CDCl<sub>3</sub>) δ 172.7, 171.3, 154.2, 150.7, 137.6, 136.1, 133.2, 129.6, 129.0, 126.5, 125.2.

**2,4-di-phenyl-6-(pyridin-3-yl)-1,3,5-triazine<sup>1</sup> (3pa)**

White solid; yield 97%; m.p.268-269 °C; Lit.m.p:254-256 °C; <sup>1</sup>H NMR (300 MHz, CDCl<sub>3</sub>) δ 9.96(s, 1H), 9.03(d, *J* = 8.1Hz, 1H), 8.85-8.69(m, 5H), 7.65-7.56(m, 7H); <sup>13</sup>C NMR (125 MHz, CDCl<sub>3</sub>) δ 172.3, 170.6, 152.7, 150.5, 137.0, 136.1, 133.3, 132.6, 129.4, 129.1, 124.1.

**2-phenyl-4,6-di-p-tolyl-1,3,5-triazine<sup>1</sup> (3ab)**

White solid; yield 87%; m.p.233-234 °C; Lit.m.p:213-216 °C; <sup>1</sup>H NMR (300 MHz, CDCl<sub>3</sub>) δ 8.77(d, *J* = 6.0 Hz, 2H), 8.66(d, *J* = 8.1Hz, 4H), 7.63-7.55(m, 3H), 7.37(d, *J* = 7.8 Hz, 4H); <sup>13</sup>C NMR (75 MHz, CDCl<sub>3</sub>) δ 171.9, 171.8, 143.4, 136.8, 134.0, 132.7, 129.7, 129.3, 129.3, 128.9, 22.1.

**2-(4-chlorophenyl)-4,6-di-p-tolyl-1,3,5-triazine<sup>1</sup> (3bb)**

White solid; yield 96%; m.p.298-299 °C; Lit.m.p.:282-285 °C; <sup>1</sup>H NMR (300 MHz, CDCl<sub>3</sub>) δ 8.69(d, *J* = 8.4 Hz, 2H), 8.63(d, *J* = 7.8 Hz, 4H), 7.52(d, *J* = 8.7 Hz, 2H), 7.36(d, *J* = 8.1 Hz, 4H), 2.48(s, 6H); <sup>13</sup>C NMR (75 MHz, CDCl<sub>3</sub>) δ 171.9, 171.0, 143.5, 138.9, 135.3, 133.8, 130.6, 129.8, 129.3, 129.2, 22.1.

**2,4,6-tri-p-tolyl-1,3,5-triazine<sup>7</sup> (3eb)**

White solid; yield 86%; m.p.297-298 °C; Lit.m.p.:283-285 °C; <sup>1</sup>H NMR (300 MHz, CDCl<sub>3</sub>) δ 8.65(d, *J* = 6.3 Hz, 6H), 7.36(d, *J* = 6.3Hz, 6H), 2.47(s, 9H); <sup>13</sup>C NMR (75 MHz, CDCl<sub>3</sub>) δ 171.7, 143.2, 134.1, 129.7, 129.3, 22.1.

**2-(o-tolyl)-4,6-di-p-tolyl-1,3,5-triazine (3fb)**

White solid; yield 66%; m.p.152-153 °C; <sup>1</sup>H NMR (300 MHz, CDCl<sub>3</sub>) δ 8.63(d, *J* = 8.1Hz, 4H), 8.30(d, *J* = 6.9Hz, 1H), 7.48-7.35(m, 7H), 2.84(s, 3H), 2.48(s, 6H); <sup>13</sup>C NMR (75 MHz, CDCl<sub>3</sub>) δ 174.7, 171.5, 143.4, 139.3, 136.7, 134.0, 132.2, 131.5, 131.2, 129.8, 129.3, 126.4, 22.7, 22.1. HRMS (APCI) calcd for C<sub>24</sub>H<sub>21</sub>N<sub>3</sub> ([M+H]<sup>+</sup>) 352.1814, found 352.1800.

**2,4-di-p-tolyl-6-(4-(trifluoromethyl)phenyl)-1,3,5-triazine (3hb)**

White solid; yield 87%; m.p.233-234 °C; <sup>1</sup>H NMR (300 MHz, CDCl<sub>3</sub>) δ 8.78(d, *J* = 7.8Hz, 2H), 8.58(d, *J* = 7.8Hz, 4H), 7.77(d, *J* = 8.1Hz, 2H), 7.33(d, *J* = 7.8Hz, 4H), 2.46(s, 6H); <sup>13</sup>C NMR (125 MHz, CDCl<sub>3</sub>) δ 172.2, 170.6, 143.7, 140.2, 134.1(q, *J* = 32.1Hz), 133.7, 129.8, 129.6, 129.4, 125.9(q, *J* = 3.5Hz), 124.4(q, *J* = 270.8Hz), 22.1. HRMS (APCI) calcd for C<sub>24</sub>H<sub>18</sub>F<sub>3</sub>N<sub>3</sub> ([M+H]<sup>+</sup>) 406.1531, found 406.1517.

**2-(4-fluorophenyl)-4,6-di-p-tolyl-1,3,5-triazine (3mb)**

White solid; yield 94%; m.p.248-249 °C; <sup>1</sup>H NMR (300 MHz, CDCl<sub>3</sub>) δ 8.79-8.74(m, 2H), 8.63(d, *J* = 8.1Hz, 4H), 7.36(d, *J* = 7.8Hz, 4H), 7.22(d, *J* = 8.7Hz, 2H), 2.48(s, 6H); <sup>13</sup>C NMR (125 MHz, CDCl<sub>3</sub>) δ 171.9, 170.8, 166.1(d, *J* = 250.9Hz), 143.4, 134.0, 133.0, 131.6(d, *J* = 8.5Hz), 129.7, 129.3, 116.0(d, *J* = 21.6Hz), 22.1. HRMS (APCI) calcd for C<sub>23</sub>H<sub>18</sub>FN<sub>3</sub> ([M+H]<sup>+</sup>) 356.1563, found 356.1548.

**2,4-bis(4-bromophenyl)-6-(4-methoxyphenyl)-1,3,5-triazine (3ic)**

White solid; yield 50%; m.p.294-295 °C; <sup>1</sup>H NMR (300MHz, CDCl<sub>3</sub>) δ 8.65(d, *J* =

8.4Hz, 2H), 8.55(d,  $J = 8.1$ Hz, 4H), 7.67(d,  $J = 8.4$ Hz, 4H), 7.04(d,  $J = 8.7$ Hz, 2H), 3.92(s, 3H);  $^{13}\text{C}$  NMR (75MHz,  $\text{CDCl}_3$ )  $\delta$  170.9, 163.9, 135.5, 132.2, 131.3, 130.8, 130.7, 128.6, 127.8, 114.4, 55.9. HRMS (ESI) calcd for  $\text{C}_{22}\text{H}_{15}\text{Br}_2\text{N}_3\text{O}$  ( $[\text{M}+\text{H}]^+$ ) 495.9660, found 495.9642.

#### **2,4-bis(4-bromophenyl)-6-(4-isopropylphenyl)-1,3,5-triazine (3lc)**

White solid; yield 66%; m.p.181-182 °C;  $^1\text{H}$  NMR (300MHz,  $\text{CDCl}_3$ )  $\delta$  8.59-8.52(m, 6H), 7.65(d,  $J = 8.1$ Hz, 4H), 7.40(d,  $J = 8.4$ Hz, 2H), 3.10-2.97(m, 1H), 1.34(d,  $J = 6.9$ Hz, 6H);  $^{13}\text{C}$  NMR (75MHz,  $\text{CDCl}_3$ )  $\delta$  172.1, 171.0, 154.6, 135.4, 133.8, 132.2, 130.7, 129.5, 127.9, 127.2, 34.7, 24.2. HRMS (APCI) calcd for  $\text{C}_{24}\text{H}_{19}\text{Br}_2\text{N}_3$  ( $[\text{M}+\text{H}]^+$ ) 508.0024, found 508.0008.

#### **2-phenyl-4,6-bis(4-(trifluoromethyl)phenyl)-1,3,5-triazine (3ad)**

White solid; yield 98%; m.p.168-169 °C;  $^1\text{H}$  NMR (300MHz,  $\text{CDCl}_3$ )  $\delta$  8.85(d,  $J = 8.1$ Hz, 4H), 8.76-8.73(m, 2H), 7.83(d,  $J = 8.1$ Hz, 4H), 7.68-7.56(m, 3H);  $^{13}\text{C}$  NMR (125MHz,  $\text{CDCl}_3$ )  $\delta$  172.6, 171.1, 139.6, 135.9, 134.5(q,  $J = 32.3$ Hz), 133.5, 129.7, 129.5, 129.2, 126.0(q,  $J = 3.5$ Hz), 124.3(q,  $J = 270.9$ Hz). HRMS (ESI) calcd for  $\text{C}_{23}\text{H}_{13}\text{F}_6\text{N}_3$  ( $[\text{M}+\text{H}]^+$ ) 446.1092, found 446.1086.

#### **2-(4-chlorophenyl)-4,6-bis(4-(trifluoromethyl)phenyl)-1,3,5-triazine (3bd)**

White solid; yield 88%; m.p.244-246 °C;  $^1\text{H}$  NMR (300MHz,  $\text{CDCl}_3$ )  $\delta$  8.83(d,  $J = 8.1$ Hz, 4H), 8.68(d,  $J = 8.4$ Hz, 2H), 7.83(d,  $J = 8.1$ Hz, 4H), 7.55(d,  $J = 8.7$ Hz, 2H);  $^{13}\text{C}$  NMR (125MHz,  $\text{CDCl}_3$ )  $\delta$  171.7, 171.2, 139.9, 139.4, 134.7(q,  $J = 32.4$ Hz), 134.4, 130.8, 129.7, 129.5, 126.1(q,  $J = 3.4$ Hz), 124.3(q,  $J = 271.0$ Hz).

#### **2-(4-methoxyphenyl)-4,6-bis(4-(trifluoromethyl)phenyl)-1,3,5-triazine (3id)**

White solid; yield 75%; m.p.190-192 °C;  $^1\text{H}$  NMR (300MHz,  $\text{CDCl}_3$ )  $\delta$  8.85(d,  $J = 8.1$ Hz, 4H), 8.73(d,  $J = 9.0$ Hz, 2H), 7.83(d,  $J = 8.1$ Hz, 4H), 7.09(d,  $J = 9.0$ Hz, 2H), 3.95(s, 3H);  $^{13}\text{C}$  NMR (125MHz,  $\text{CDCl}_3$ )  $\delta$  172.2, 170.9, 164.2, 139.8, 134.4(q,  $J = 32.4$ Hz), 131.5, 129.6, 128.4, 125.98(q,  $J = 3.4$ Hz), 124.3(q,  $J = 270.7$ Hz), 114.6, 55.9. HRMS (ESI) calcd for  $\text{C}_{24}\text{H}_{15}\text{F}_6\text{N}_3\text{O}$  ( $[\text{M}+\text{H}]^+$ ) 476.1197, found 476.1192.

#### **2,4-diphenyl-1,3,5-triazine<sup>1</sup> (3qa)**

Light yellow solid; yield 75%; m.p.81-82 °C; Lit.m.p:76-78 °C;  $^1\text{H}$  NMR (300MHz,

CDCl<sub>3</sub>)  $\delta$  9.27(s, 1H), 8.67-8.64(m, 4H), 7.64-7.53(m, 6H); <sup>13</sup>C NMR (75MHz, CDCl<sub>3</sub>)  $\delta$  171.7, 167.1, 135.9, 133.2, 129.3, 129.1.

**2-methyl-4,6-diphenyl-1,3,5-triazine<sup>8</sup> (3ra)**

Light yellow solid; yield 86%; m.p.97-98 °C; Lit.m.p:109-110 °C; <sup>1</sup>H NMR (300MHz, CDCl<sub>3</sub>)  $\delta$  8.67-8.64(m, 4H), 7.62-7.52(m, 6H), 2.80(s, 3H); <sup>13</sup>C NMR (75MHz, CDCl<sub>3</sub>)  $\delta$  177.4, 171.6, 136.3, 132.9, 129.3, 129.0, 26.5. HRMS (ESI) calcd for C<sub>16</sub>H<sub>13</sub>N<sub>3</sub> ([M+H]<sup>+</sup>) 248.1188, found 248.1176.

**2,4-diphenyl-6-propyl-1,3,5-triazine<sup>9</sup> (3sa)**

White solid; yield 75%; m.p.77-79 °C; Lit.m.p:79-80 °C; <sup>1</sup>H NMR (300MHz, CDCl<sub>3</sub>)  $\delta$  8.67(d, *J* = 6.6Hz, 4H), 7.60-7.54(m, 6H), 3.00(t, *J* = 7.5Hz, 2H), 2.07-1.95(m, 2H), 1.09(t, *J* = 7.5Hz, 3H); <sup>13</sup>C NMR (75MHz, CDCl<sub>3</sub>)  $\delta$  180.3, 171.5, 136.4, 132.8, 129.3, 129.0, 41.5, 21.5, 14.4. HRMS (ESI) calcd for C<sub>18</sub>H<sub>17</sub>N<sub>3</sub> ([M+H]<sup>+</sup>) 276.1501, found 276.1497.

**2-isopropyl-4,6-diphenyl-1,3,5-triazine (3ta)**

White solid; yield 70%; m.p.45-47 °C; <sup>1</sup>H NMR (300MHz, CDCl<sub>3</sub>)  $\delta$  8.69-8.67(m, 4H), 7.61-7.52(m, 6H), 3.30-3.21(m, 1H), 1.47(d, *J* = 6.6Hz, 6H); <sup>13</sup>C NMR(125MHz, CDCl<sub>3</sub>)  $\delta$  184.4, 171.6, 136.7, 132.7, 129.3, 129.0, 37.9, 21.5. HRMS (ESI) calcd for C<sub>18</sub>H<sub>17</sub>N<sub>3</sub> ([M+H]<sup>+</sup>) 276.1501, found 276.1491.

**2,4-di-p-tolyl-1,3,5-triazine<sup>1</sup> (3qb)**

White solid; yield 71%; m.p.150-151 °C; Lit.m.p:160-162 °C; <sup>1</sup>H NMR (300MHz, CDCl<sub>3</sub>)  $\delta$  9.20(s, 1H), 8.53(d, *J* = 8.4Hz, 4H), 7.35(d, *J* = 8.1Hz, 4H), 2.47(s, 6H); <sup>13</sup>C NMR(75MHz, CDCl<sub>3</sub>)  $\delta$  171.5, 166.8, 143.9, 133.2, 129.9, 129.3, 22.1.

**2-methyl-4,6-di-p-tolyl-1,3,5-triazine (3rb)**

White solid; yield 80%; m.p.144-145 °C; Lit.m.p:152-153 °C; <sup>1</sup>H NMR (300MHz, CDCl<sub>3</sub>)  $\delta$  8.53(d, *J* = 8.4Hz, 4H), 7.33(d, *J* = 7.8Hz, 4H), 2.76(s, 3H), 2.46(s, 6H); <sup>13</sup>C NMR (75MHz, CDCl<sub>3</sub>)  $\delta$  177.1, 171.5, 143.4, 133.7, 129.8, 129.2, 26.5, 22.1. HRMS (ESI) calcd for C<sub>18</sub>H<sub>17</sub>N<sub>3</sub> ([M+H]<sup>+</sup>) 276.1501, found 276.1490.



# <sup>1</sup>H and <sup>13</sup>C NMR spectra of the products.

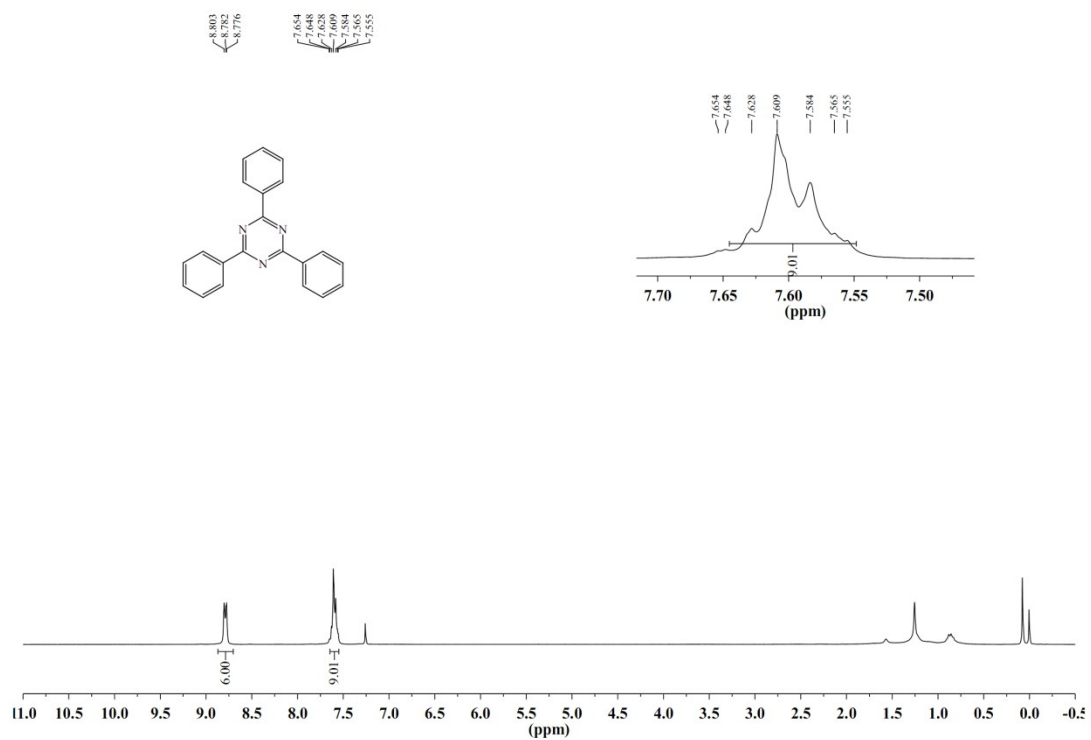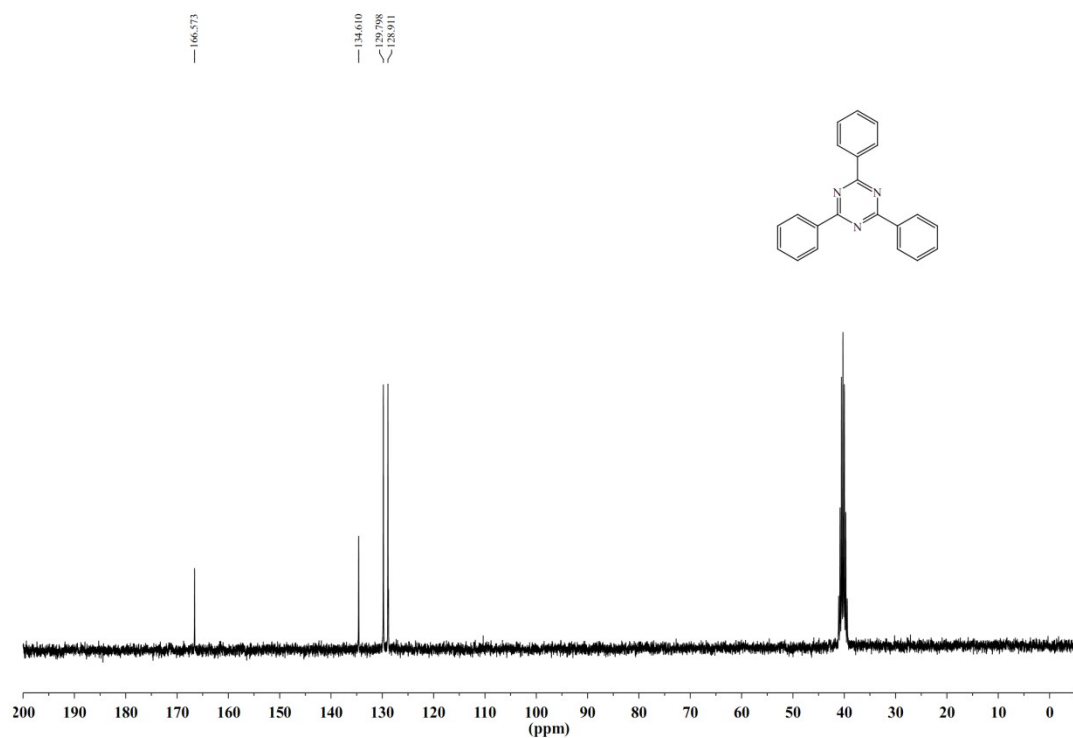

3aa

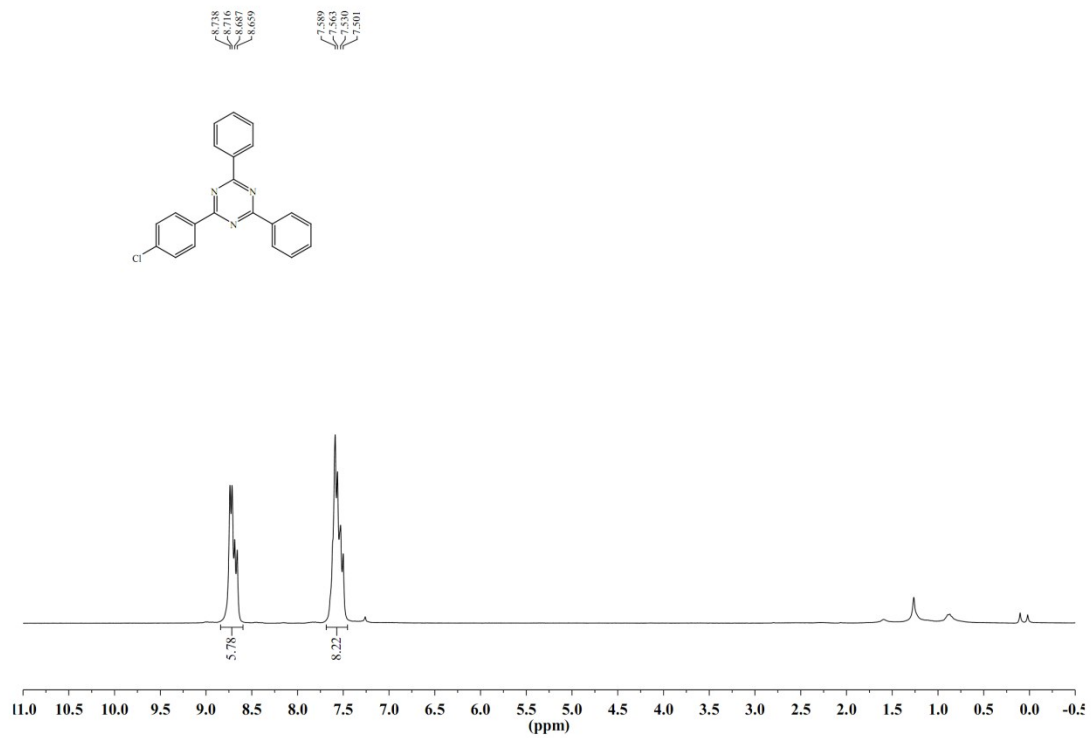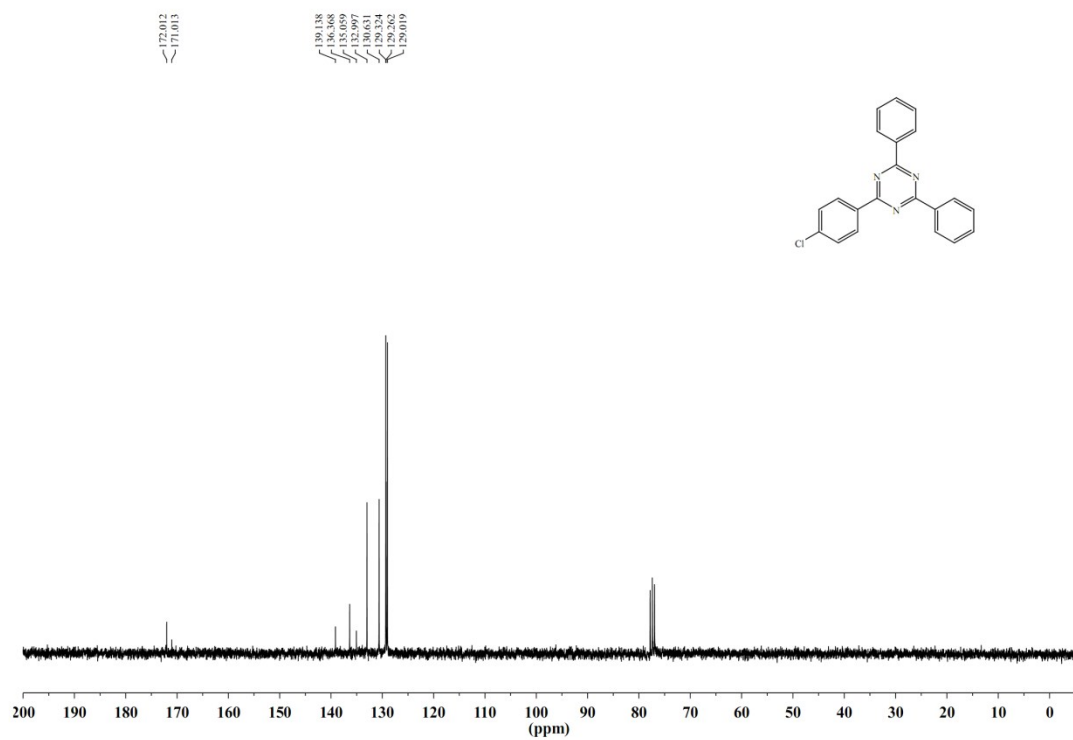

**3ba**

**S10**



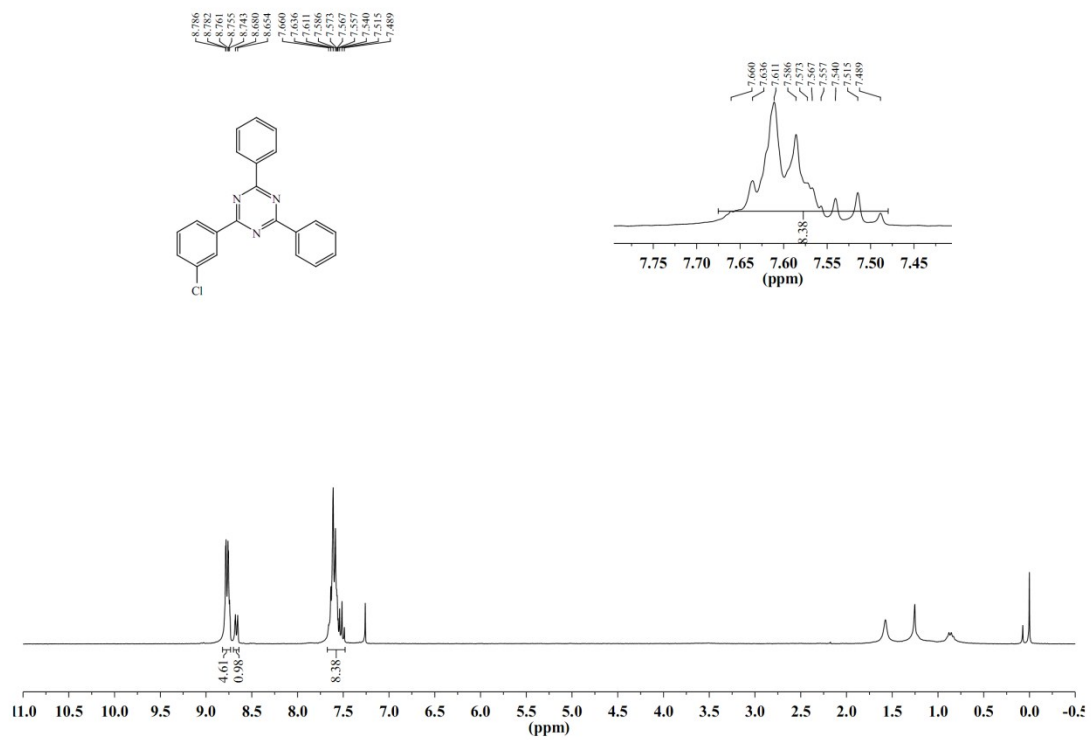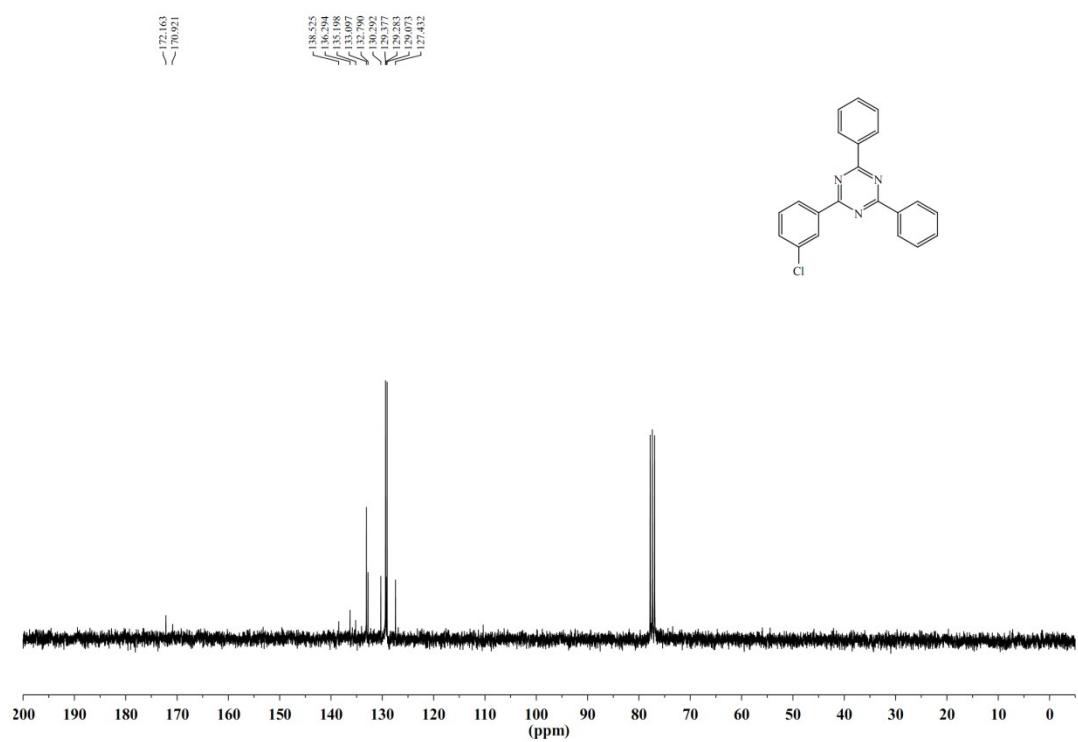

3da

S12

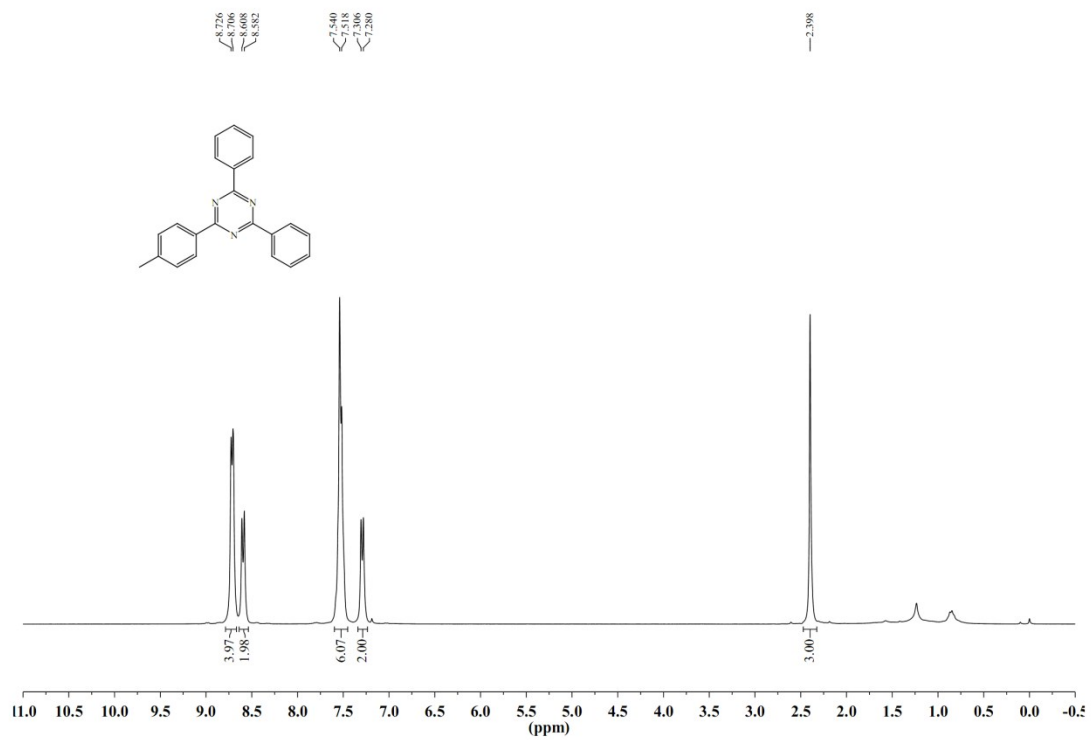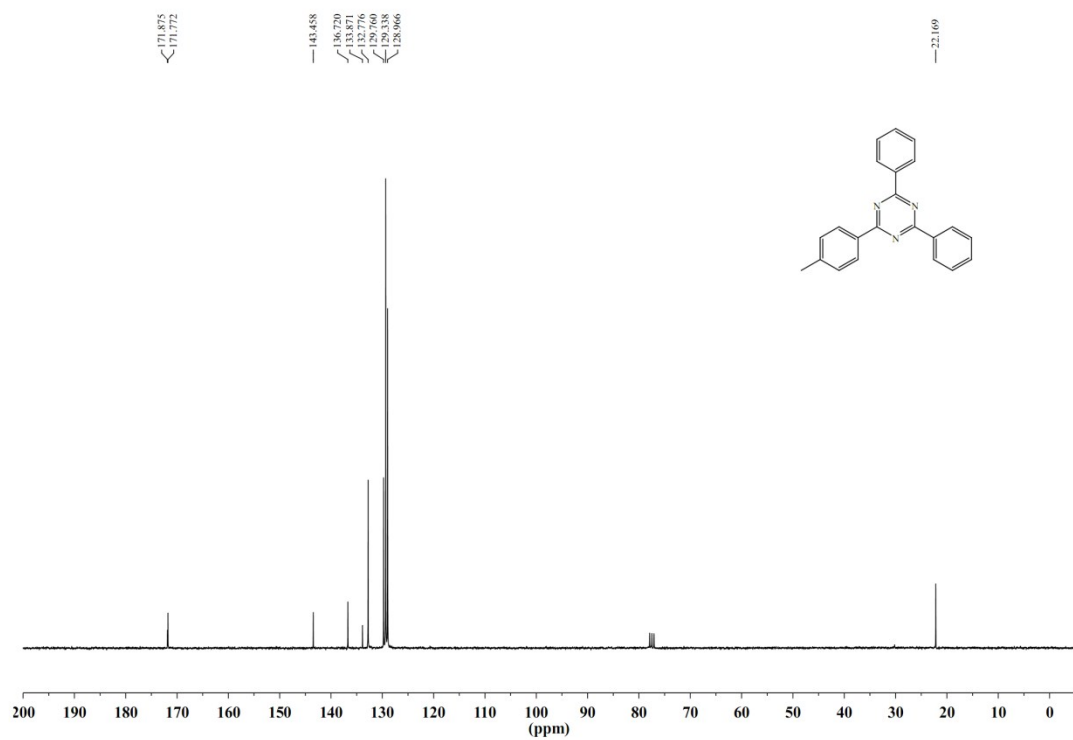

3ea

S13

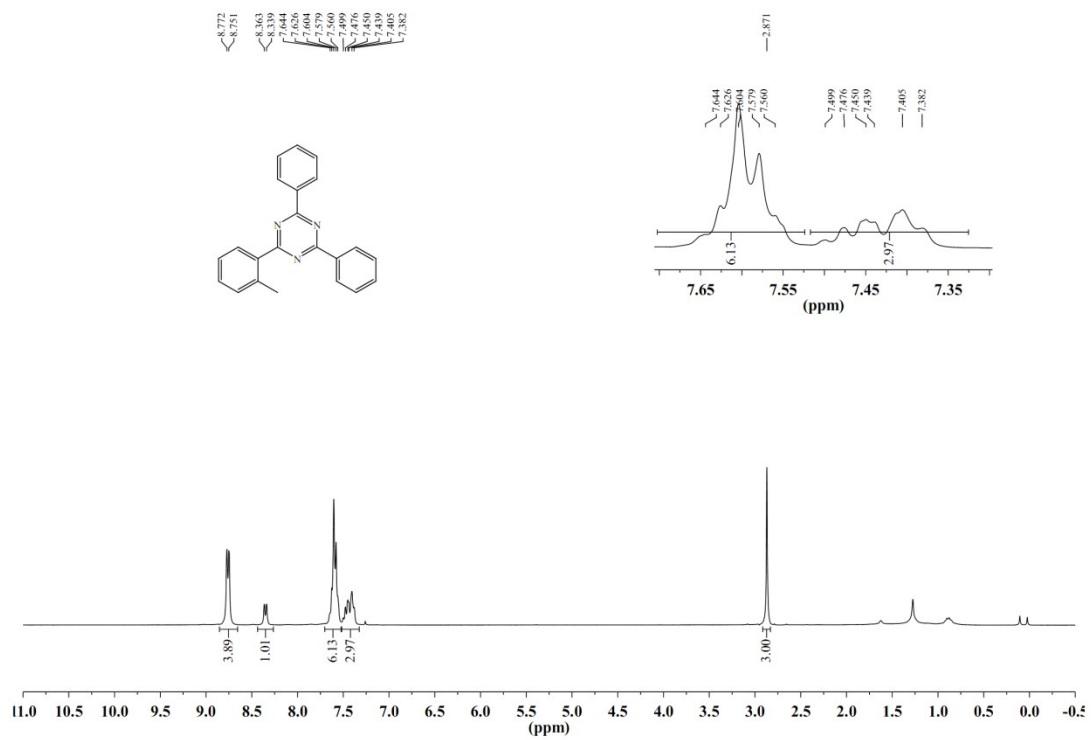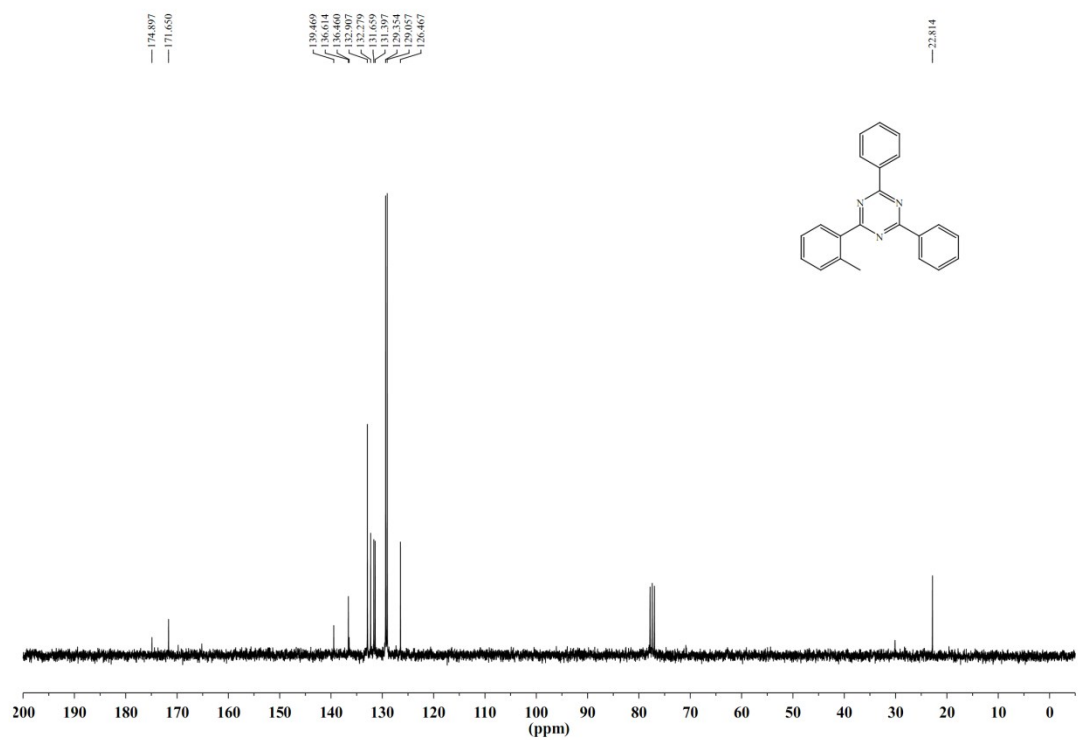

3fa

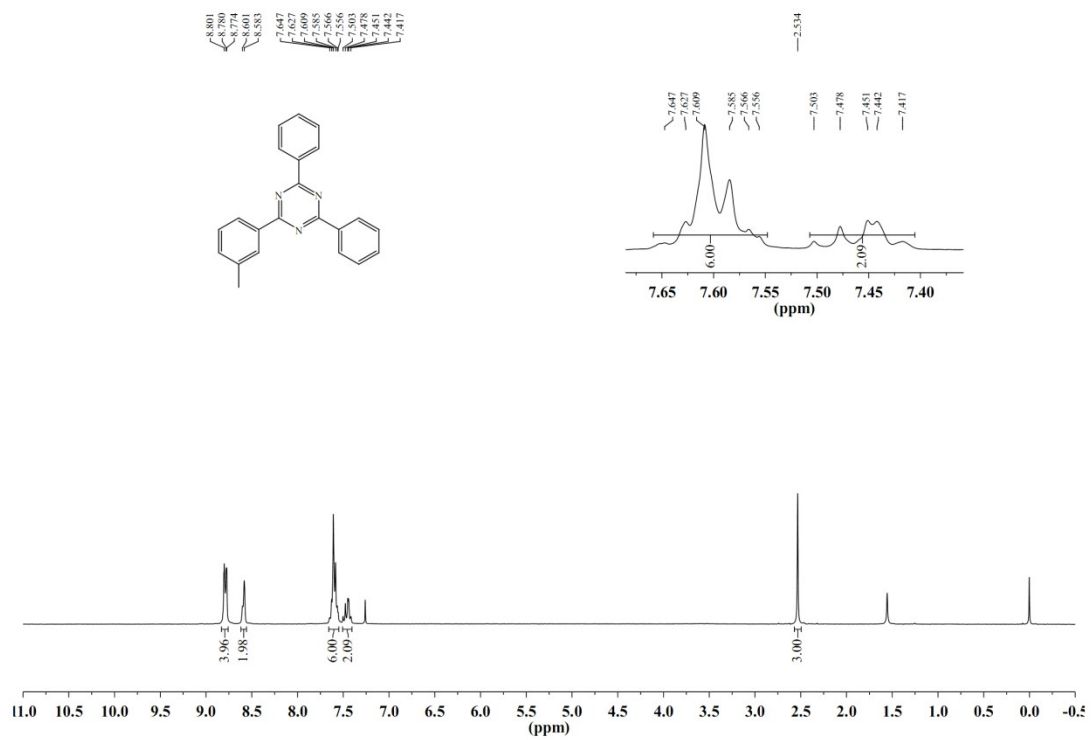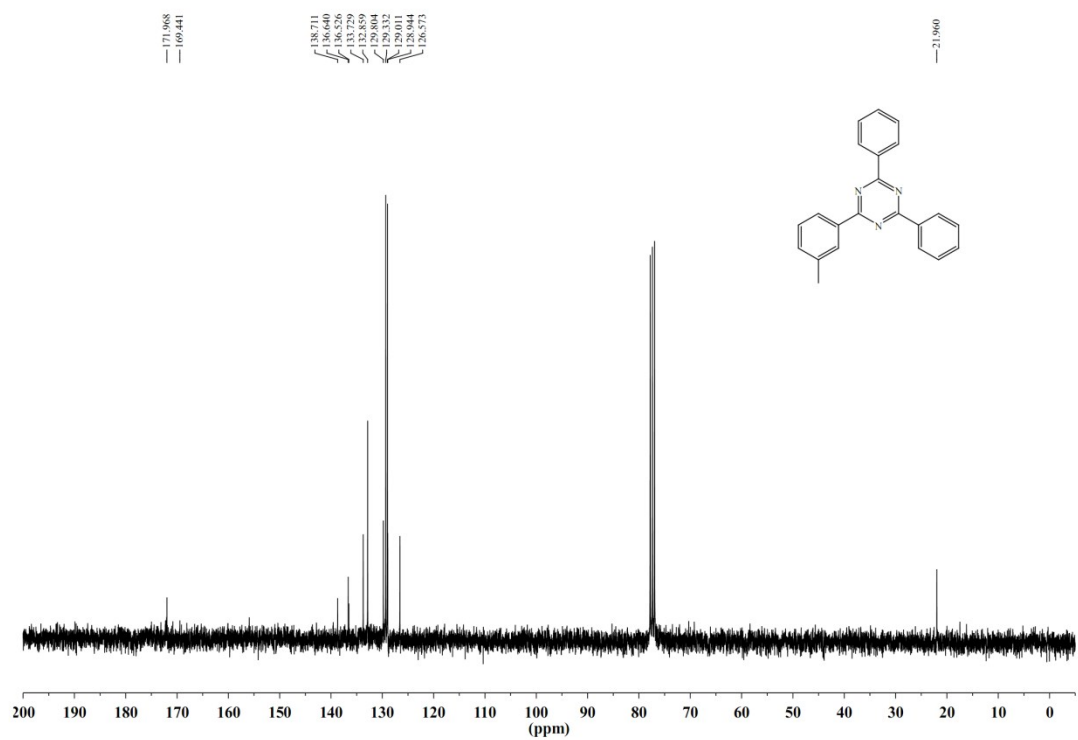

3ga

S15





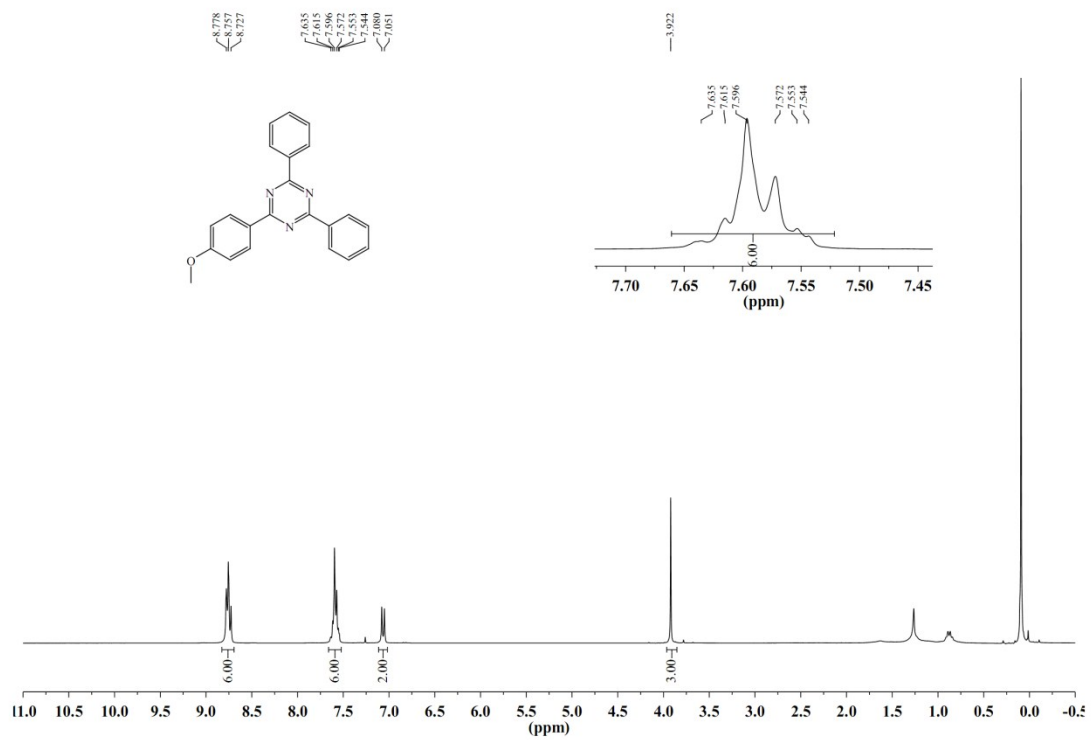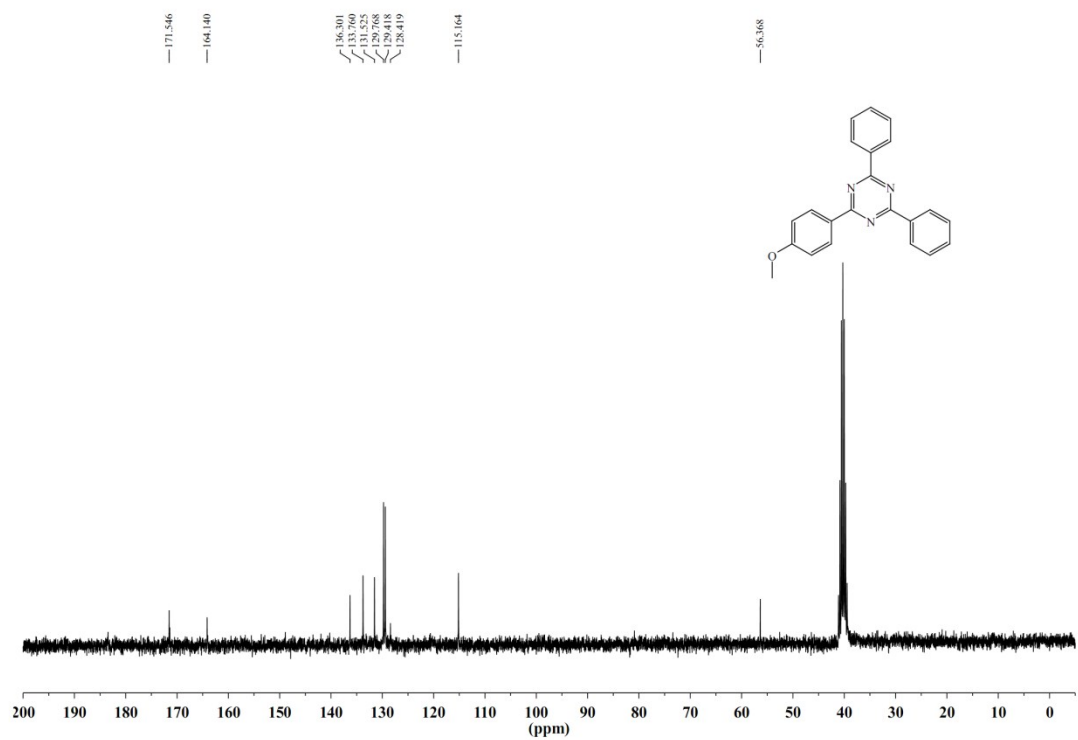

3a

S17

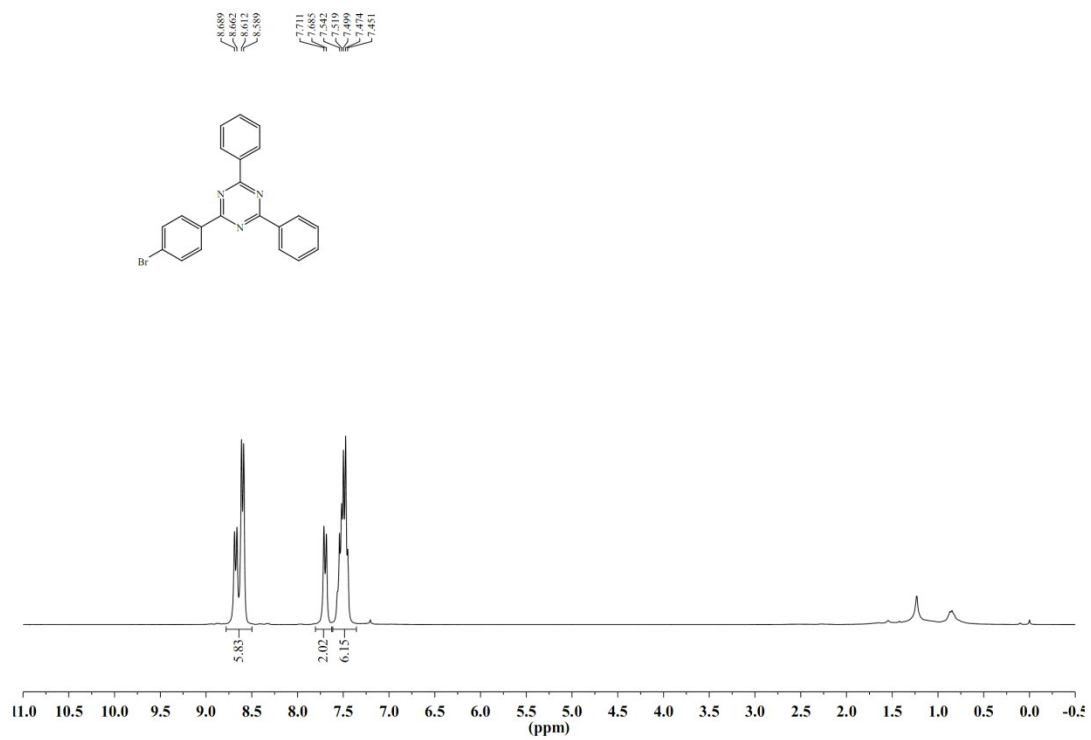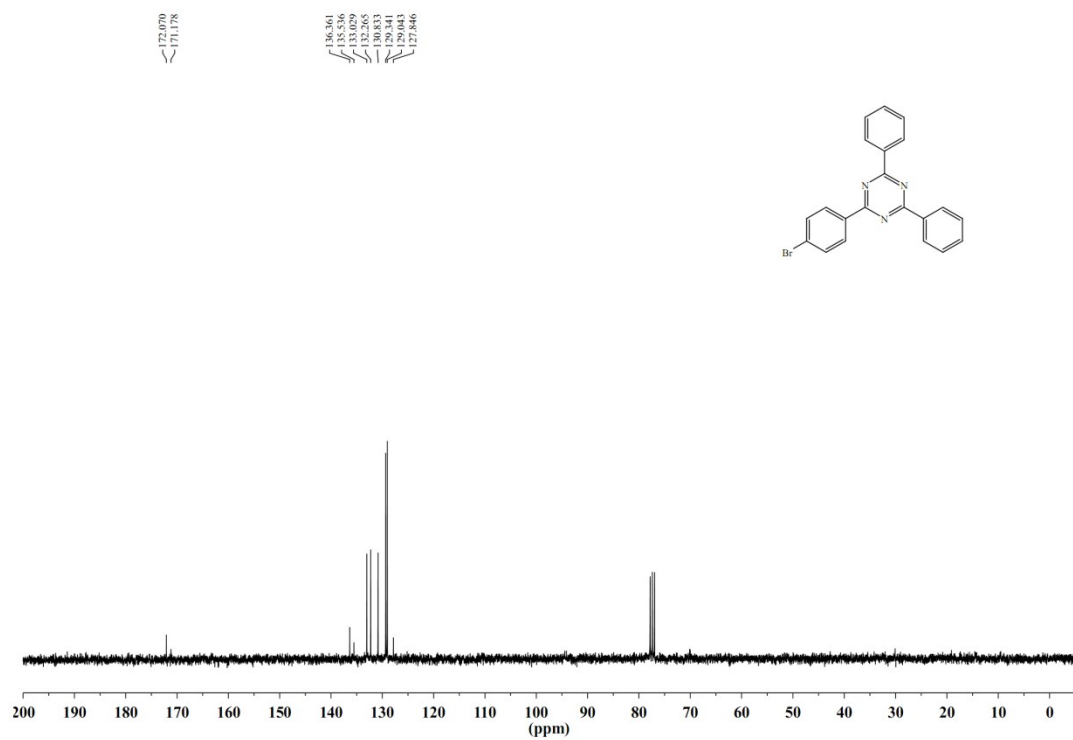

3ja

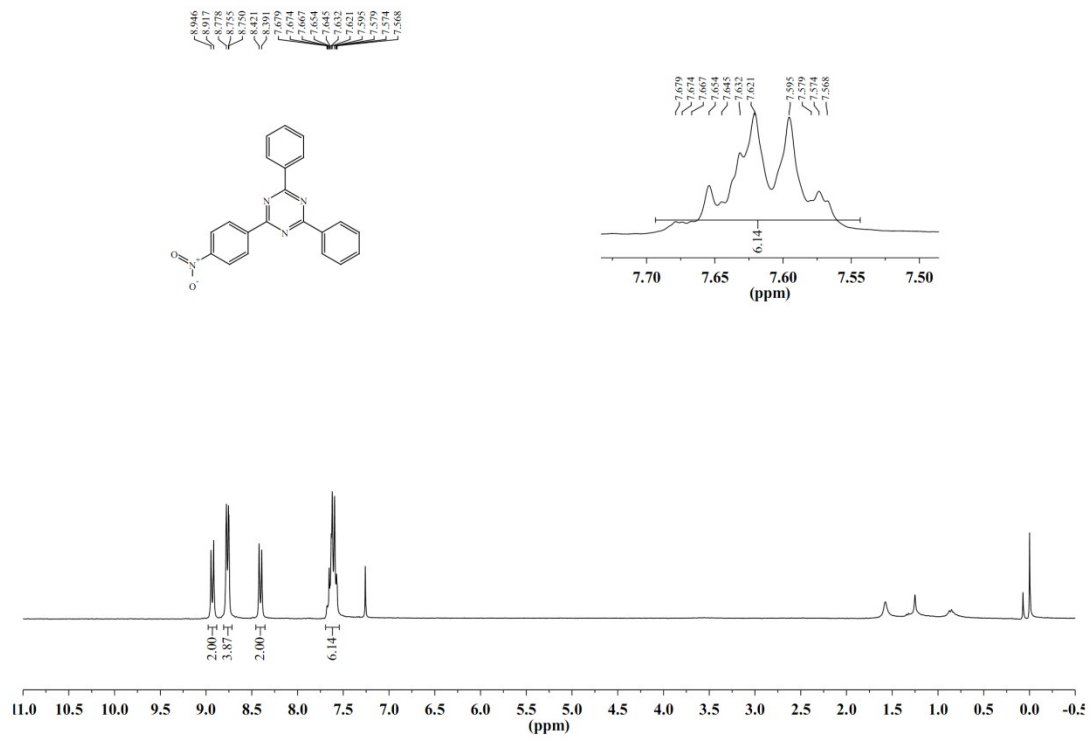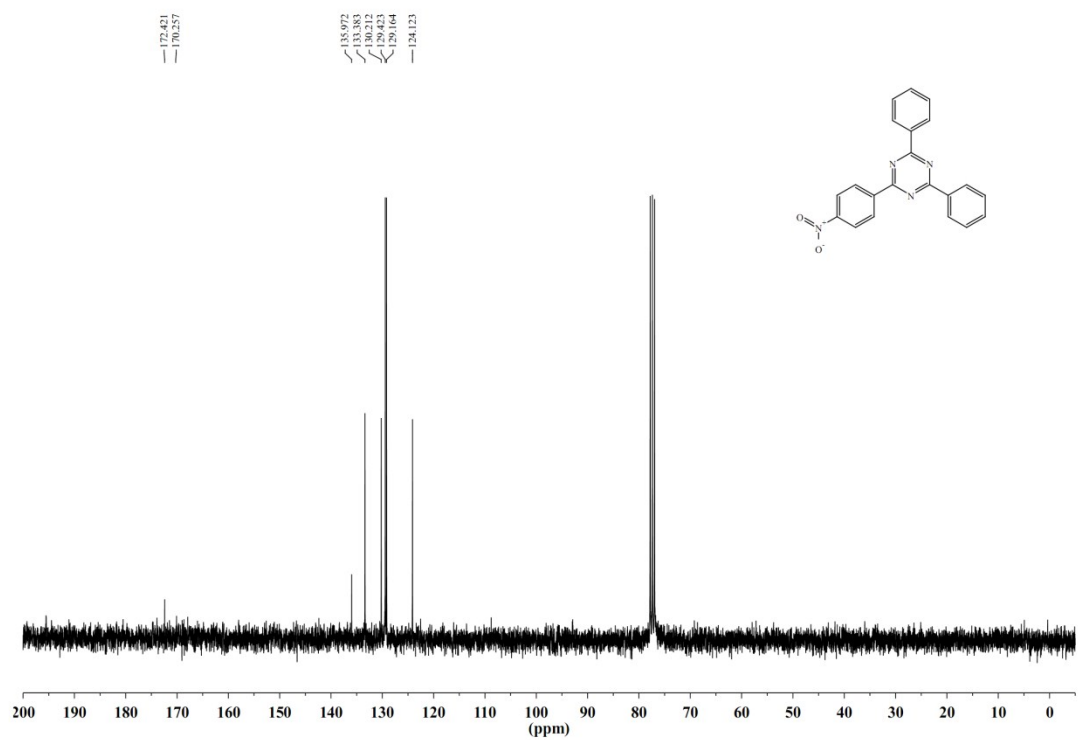

3ka

S19

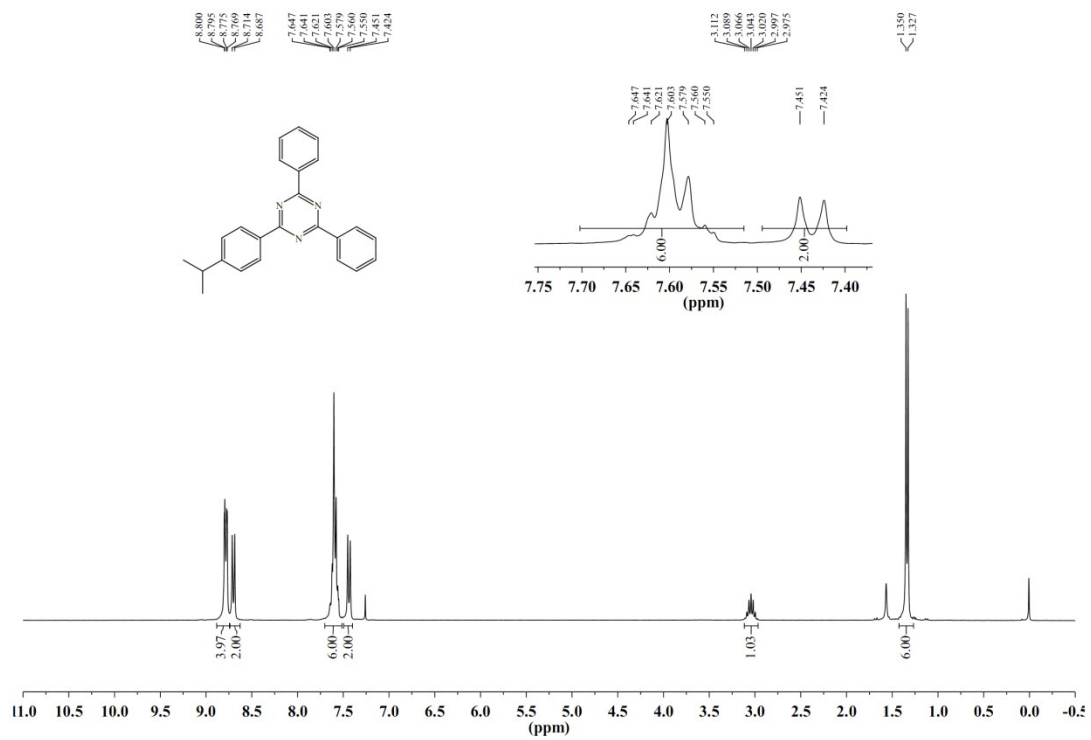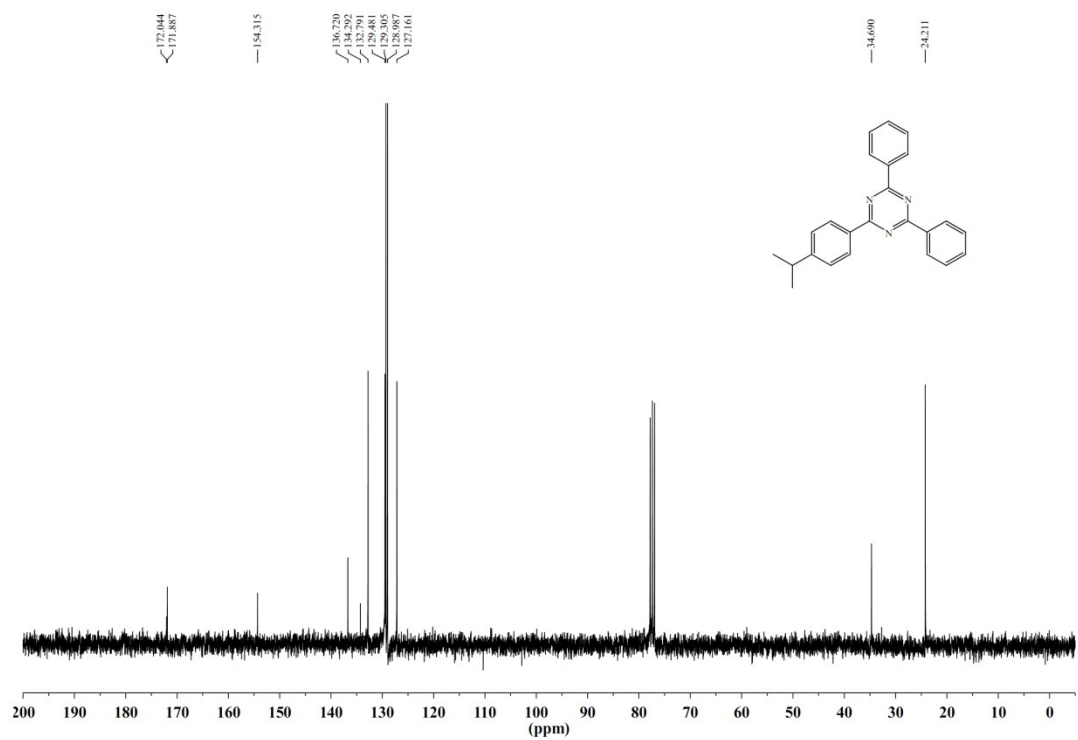

**3la**

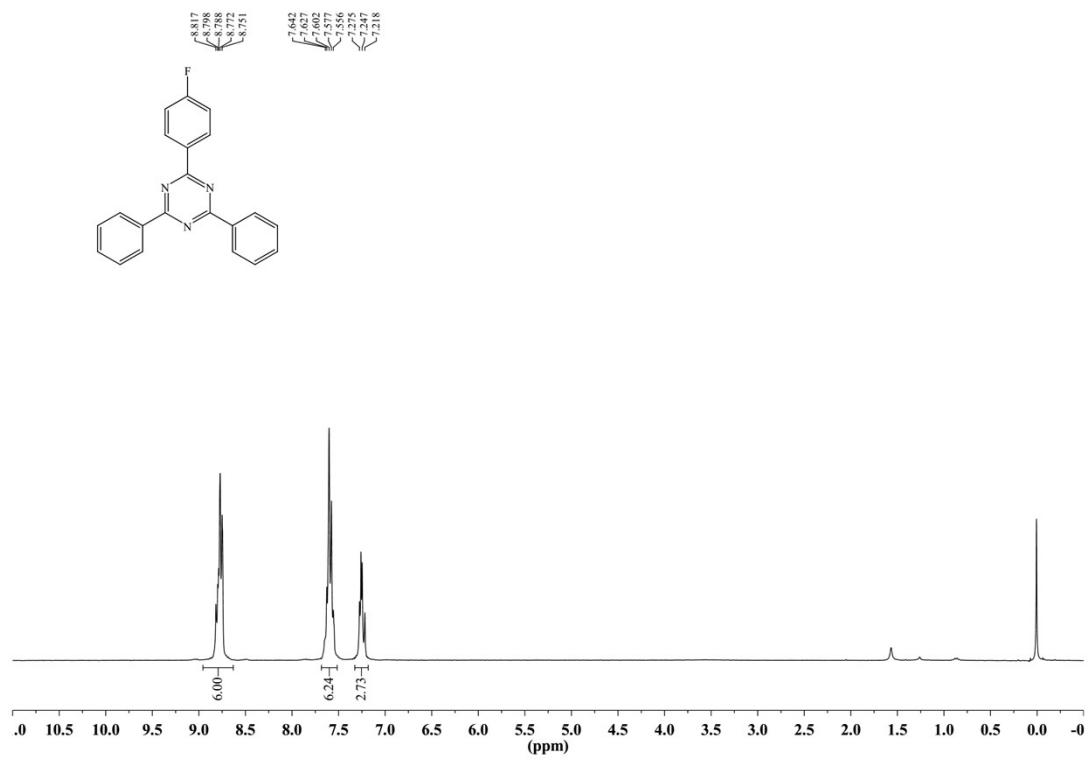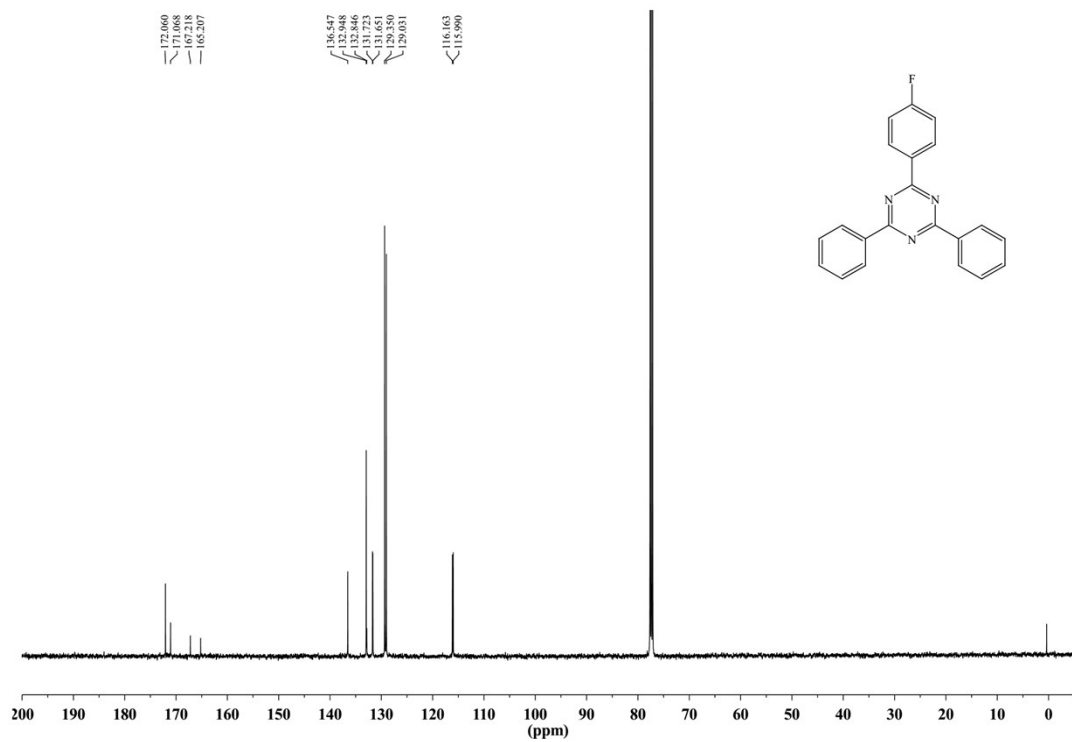

3ma

S21

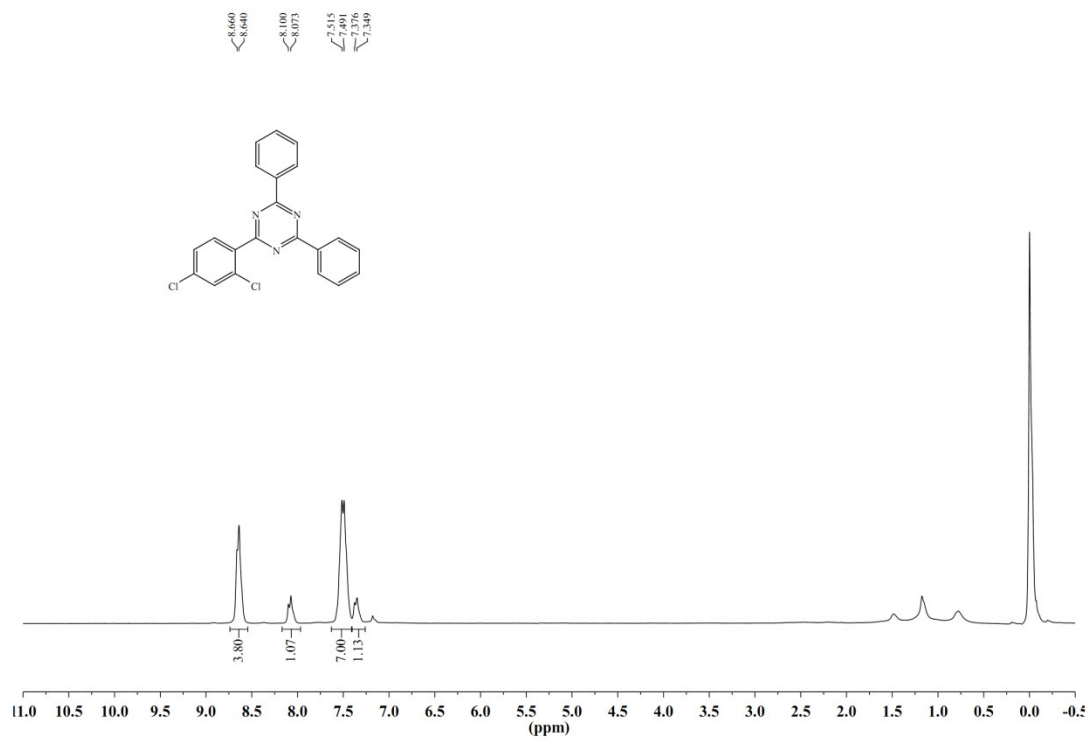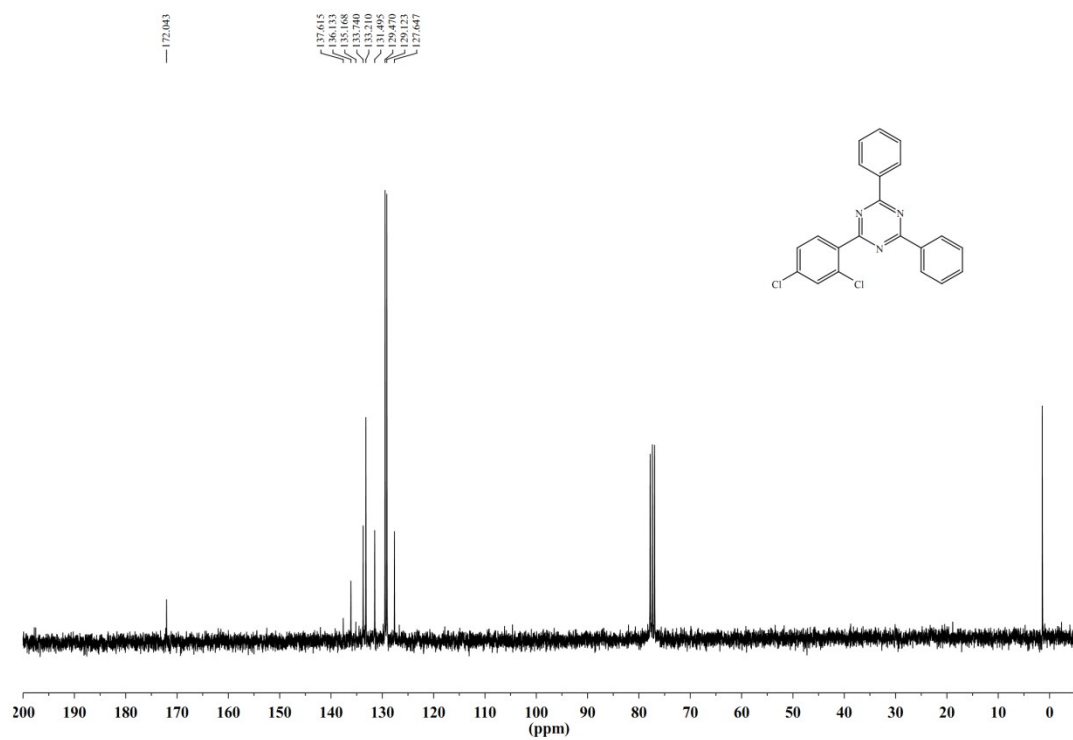

3a

S22

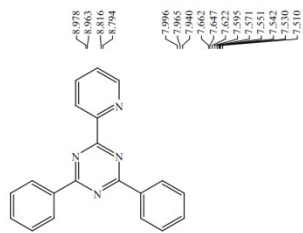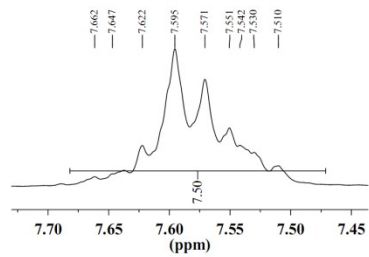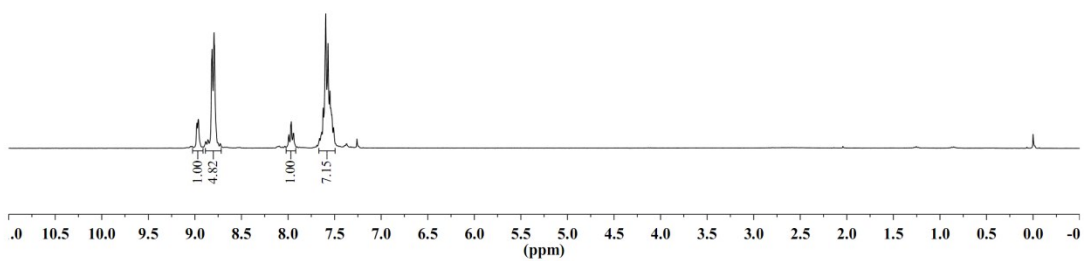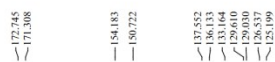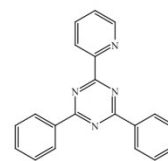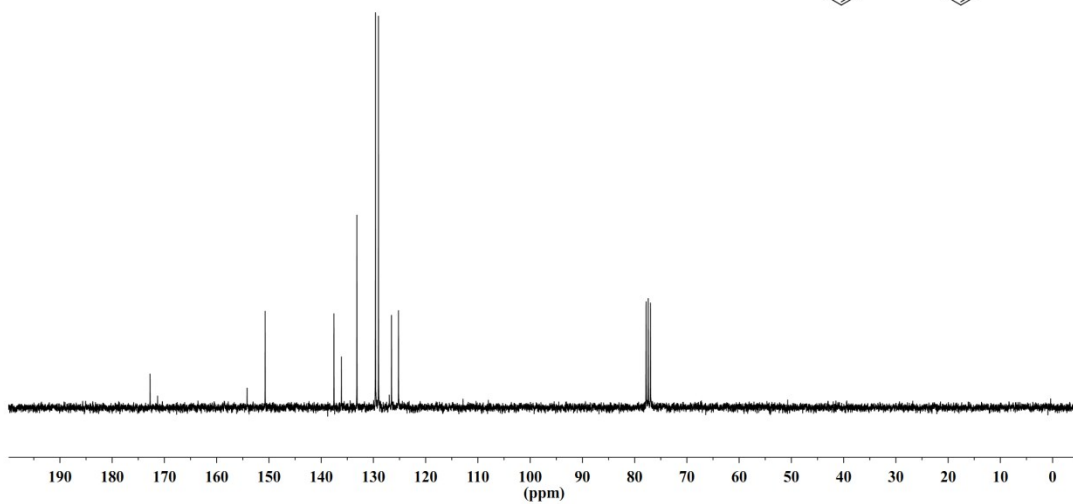

30a

S23

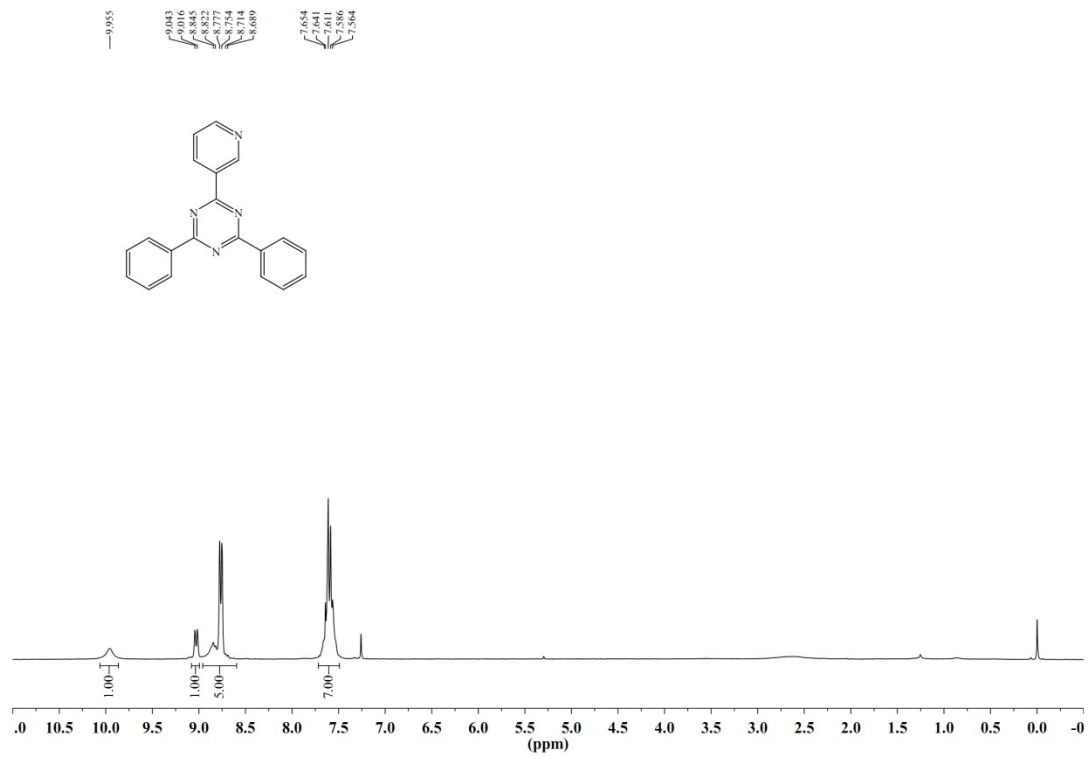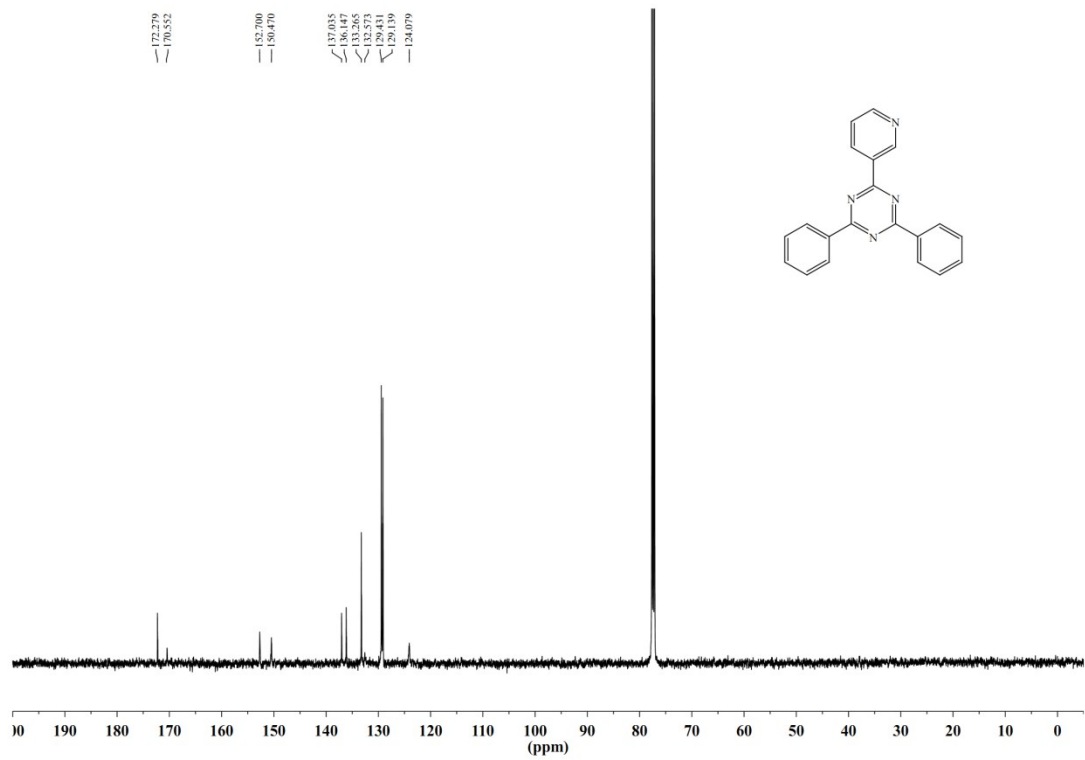

3pa

S24



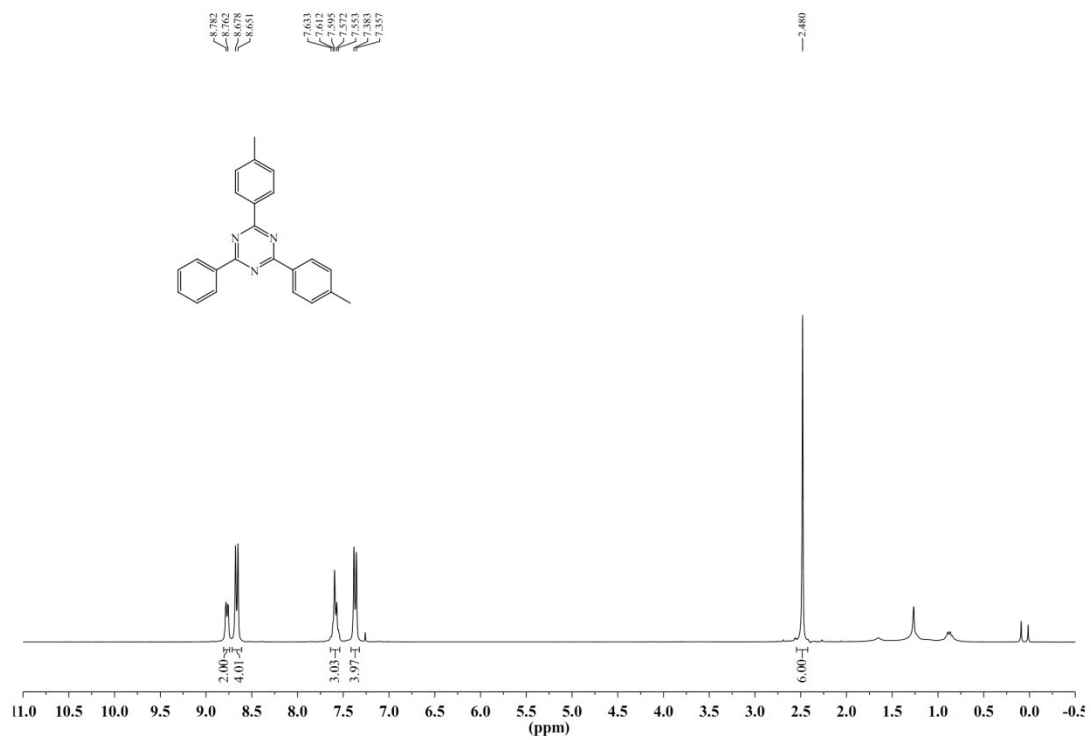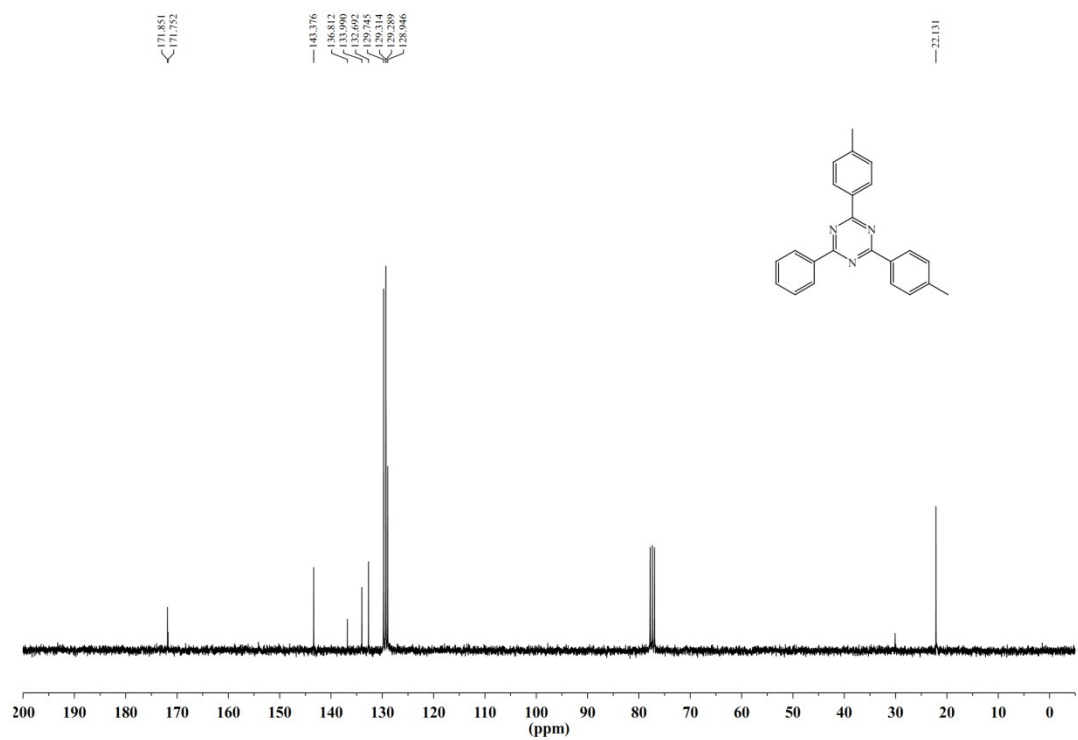

3ab

S25

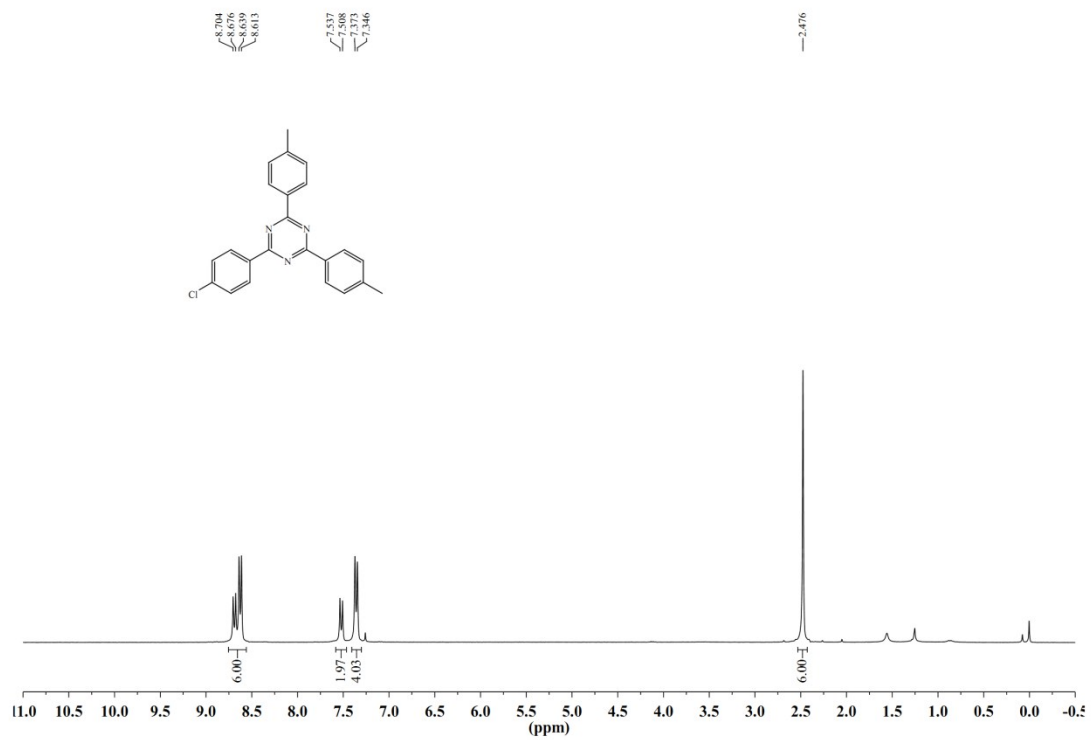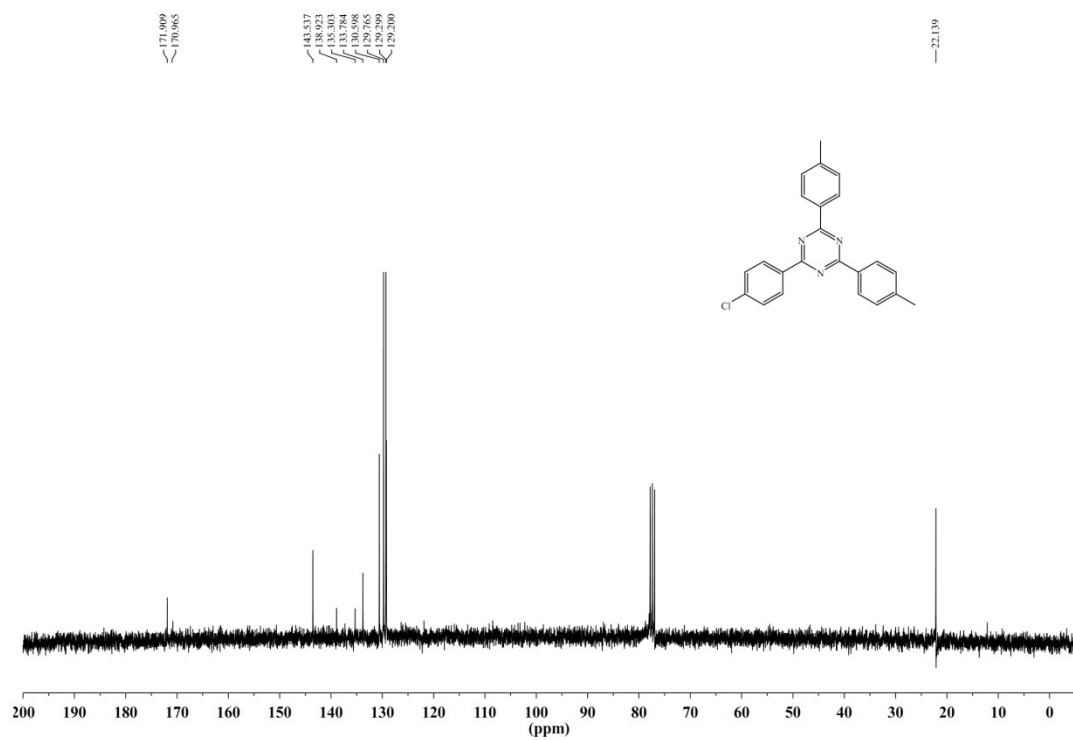

3b

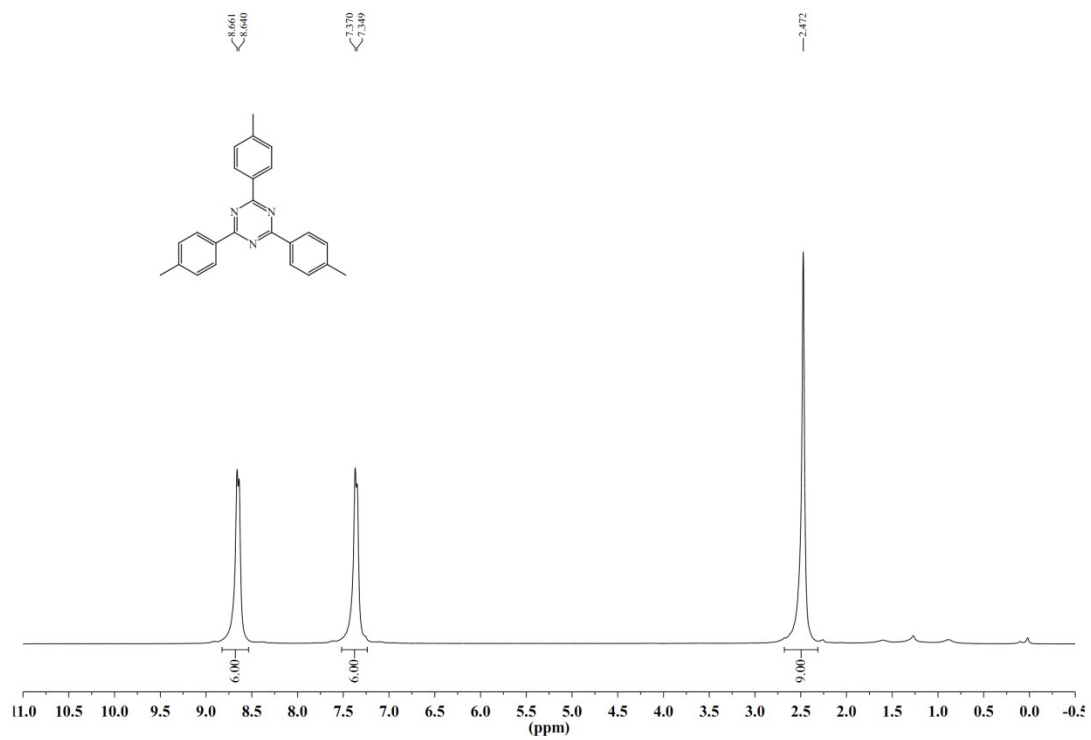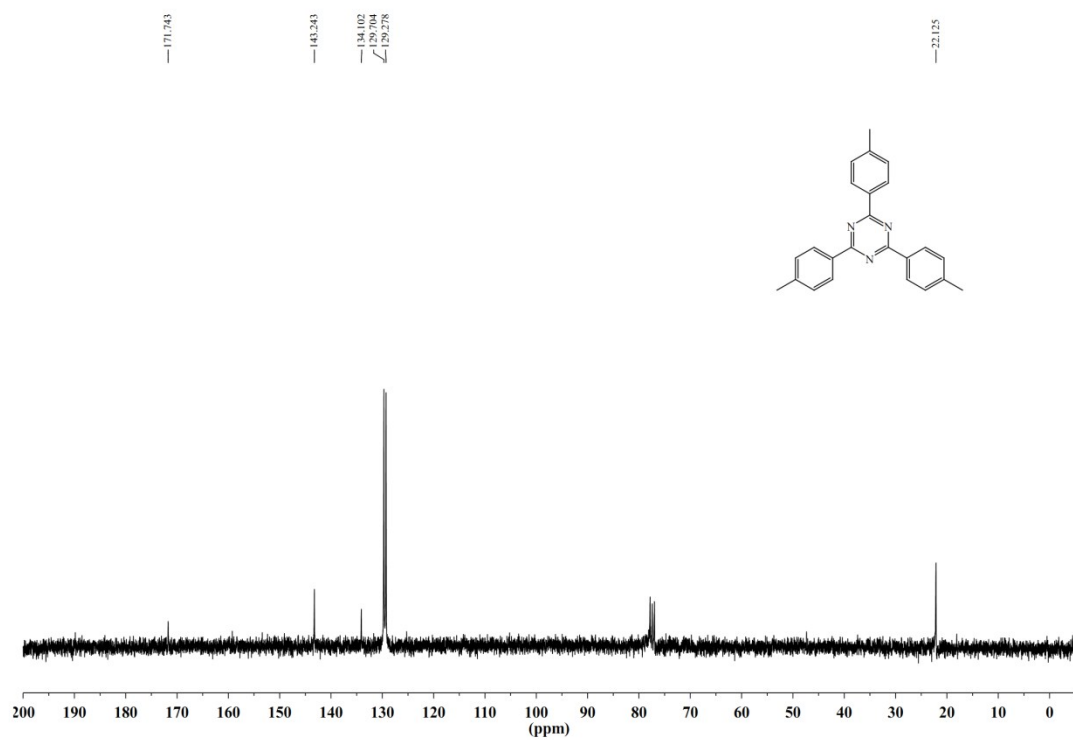

3b

S27

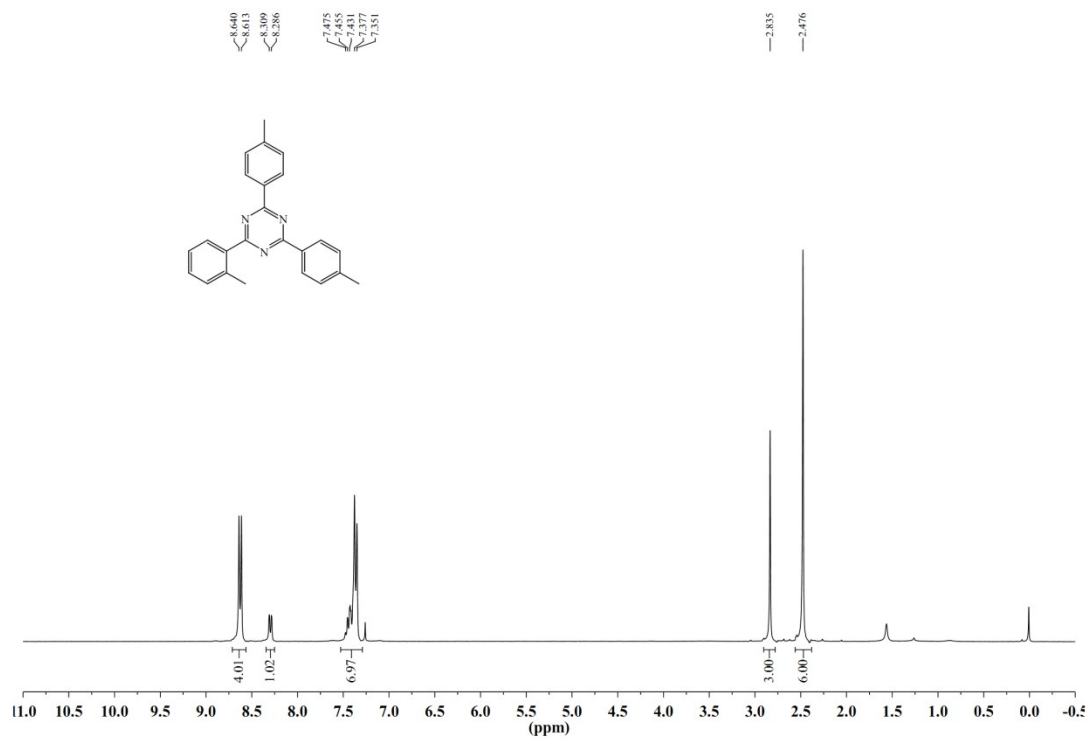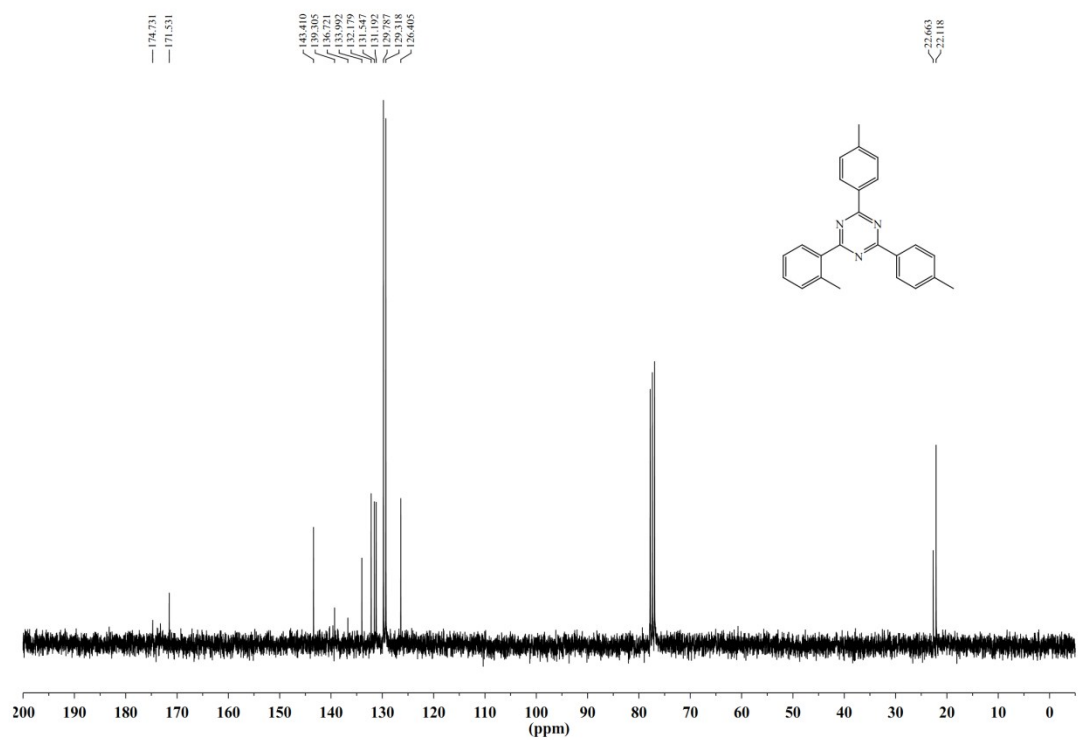

3fb

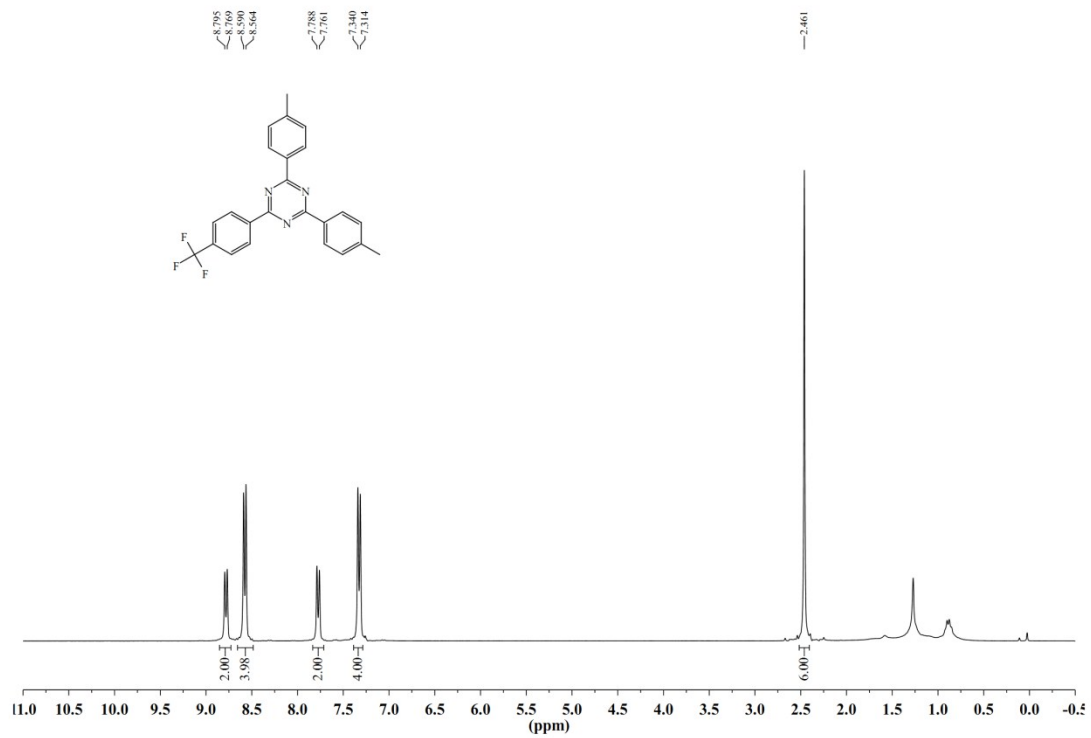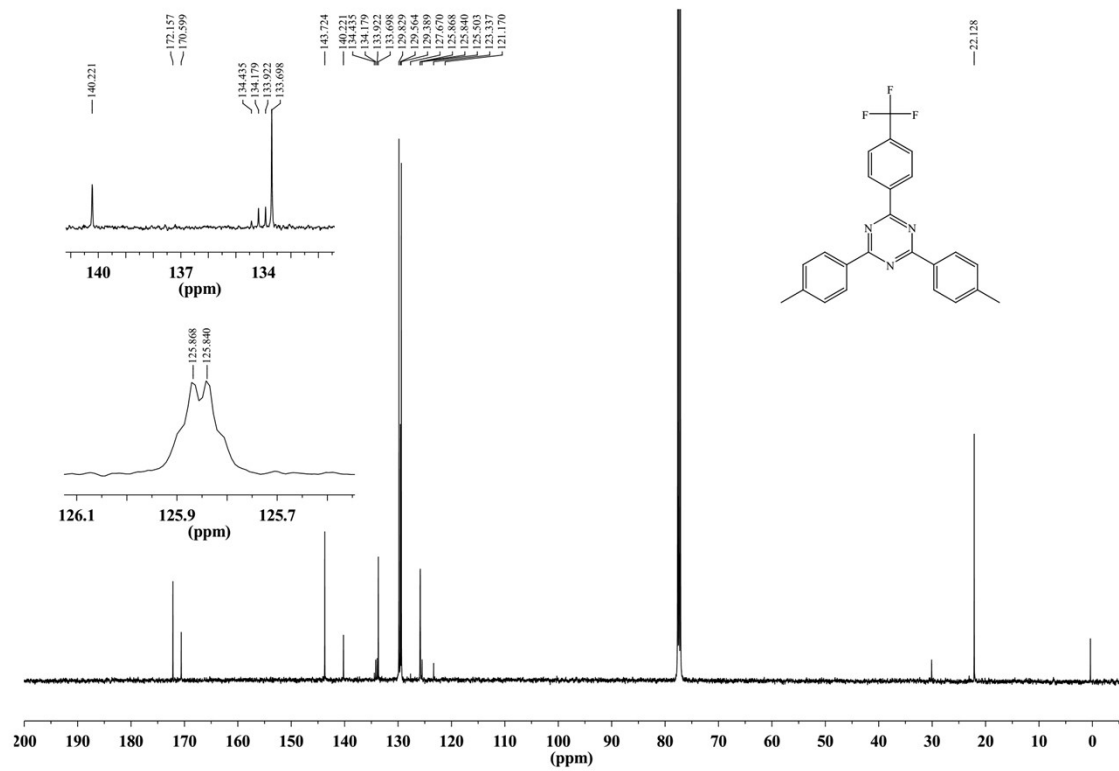

**3hb**

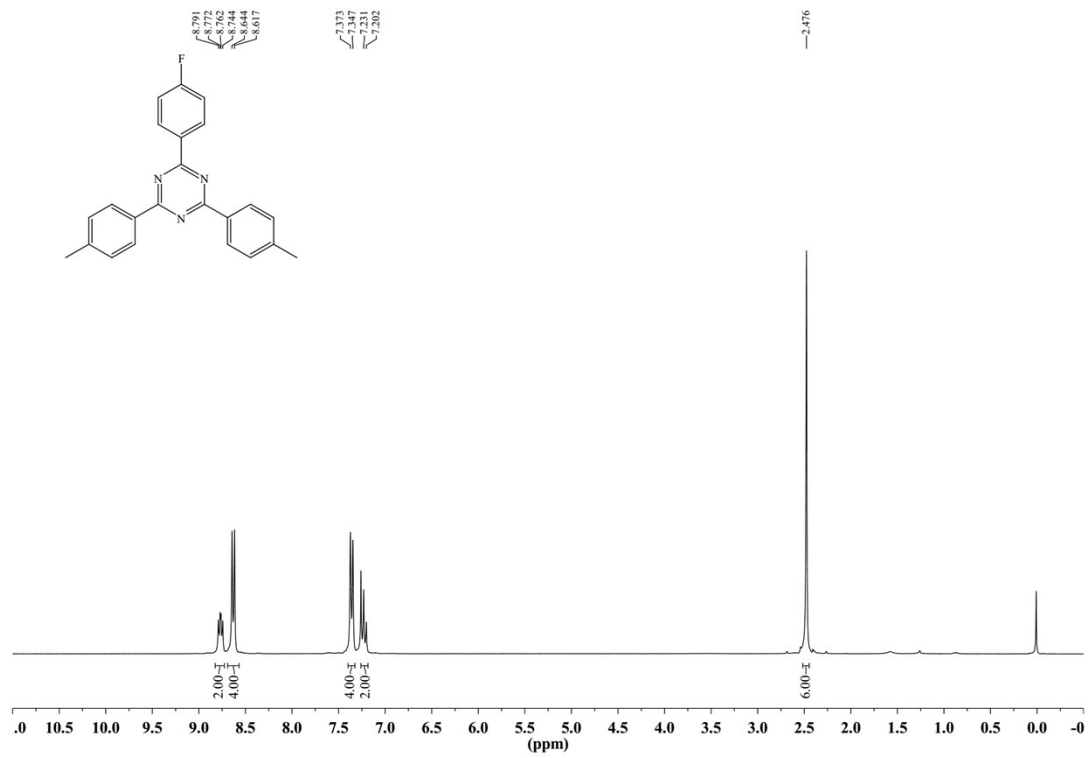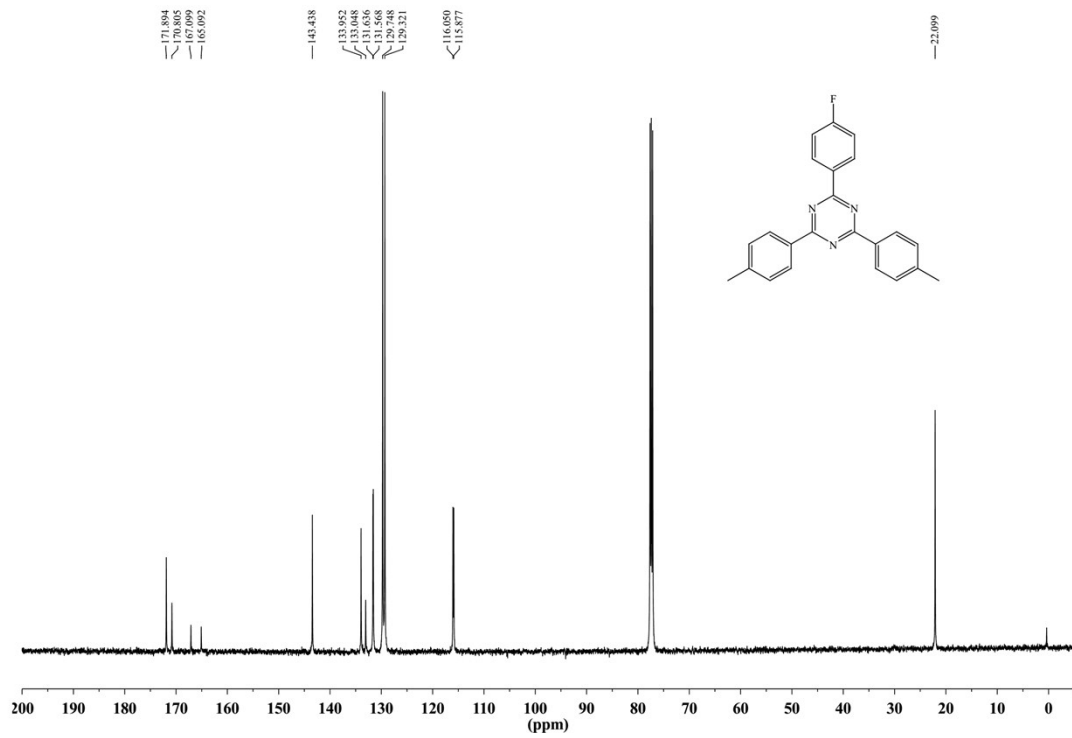

3mb

S30

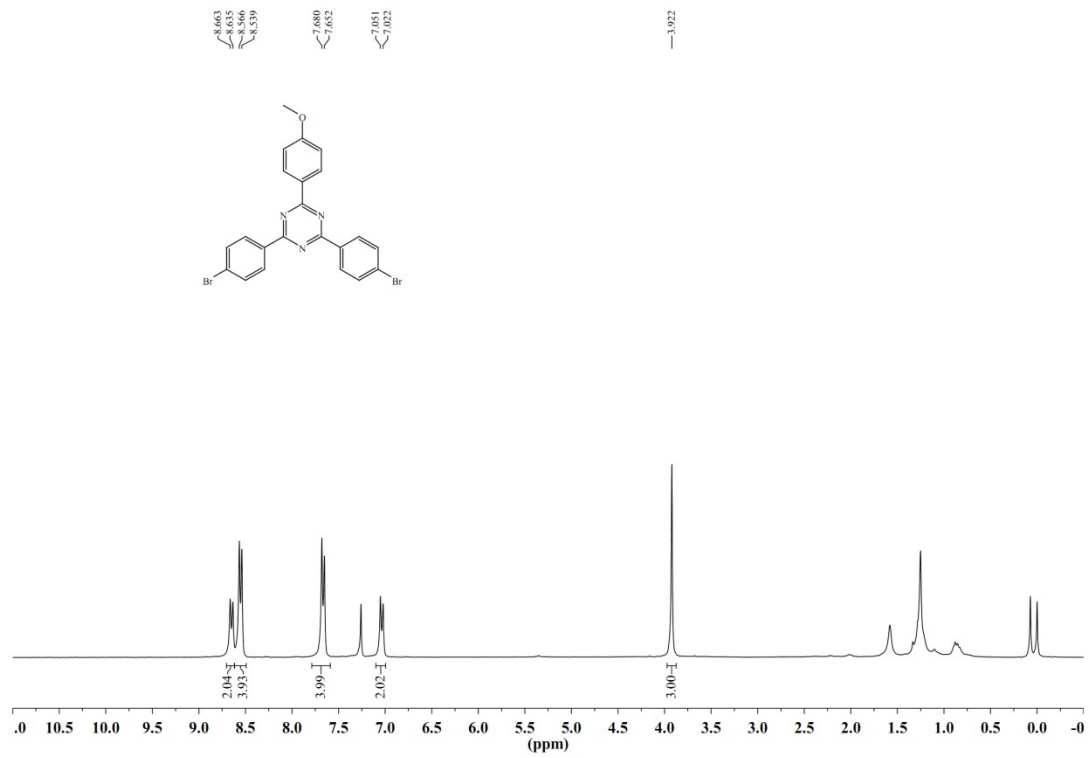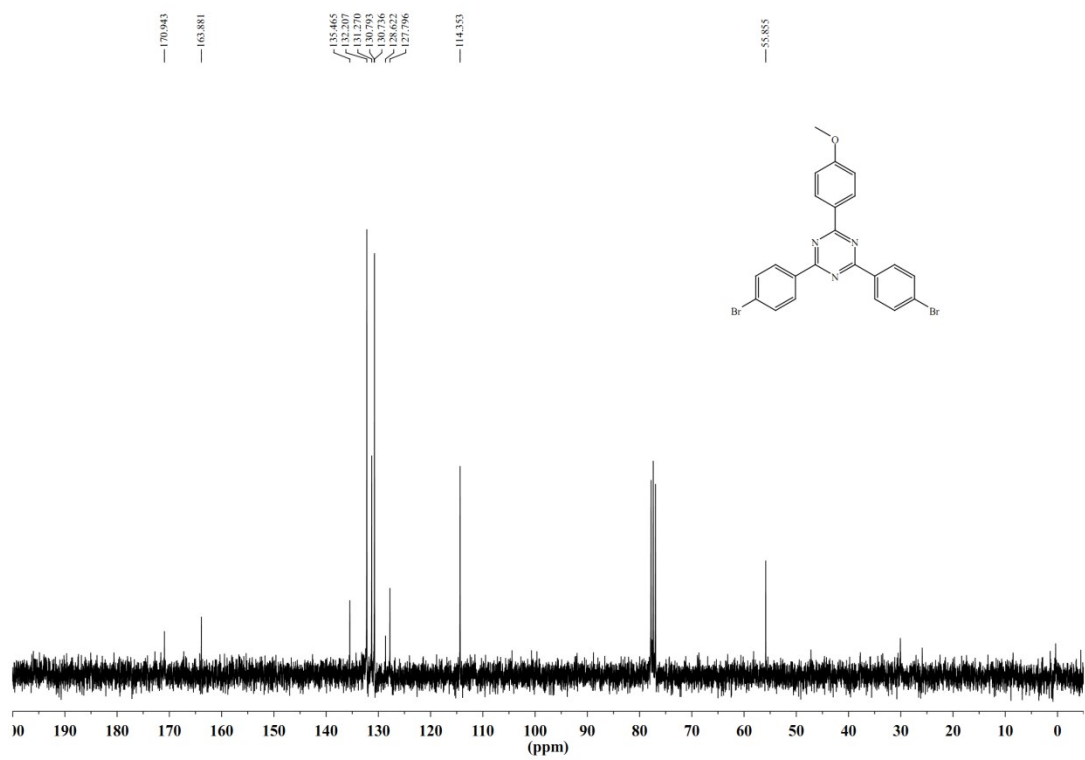

3ic

S31

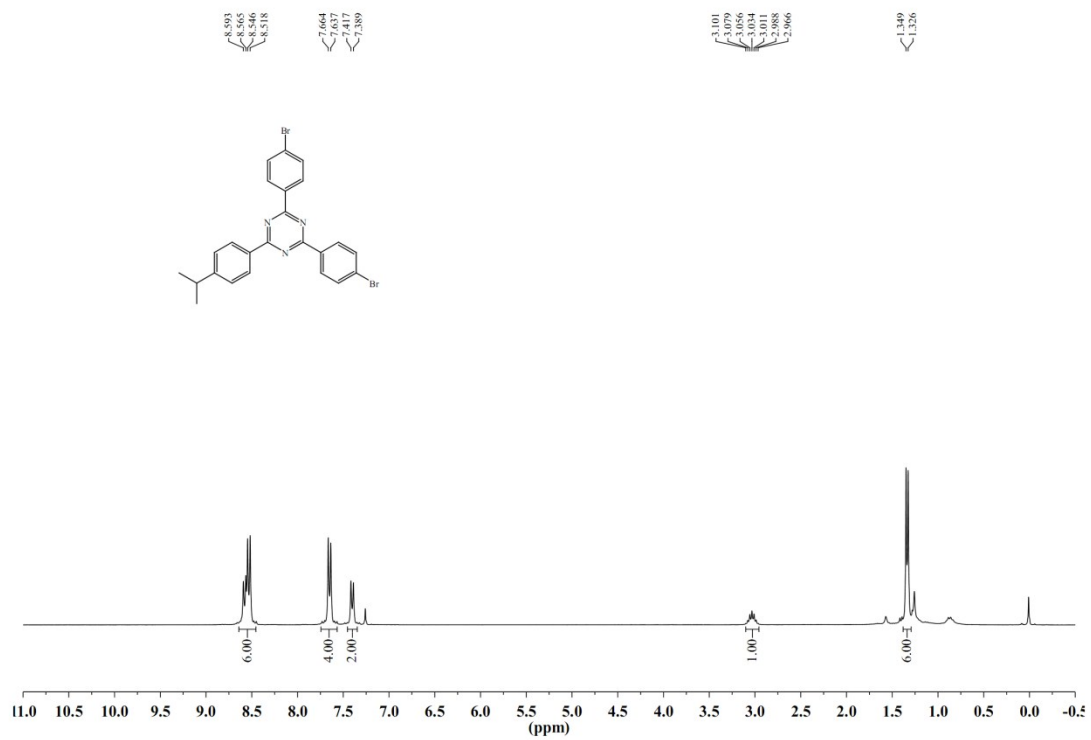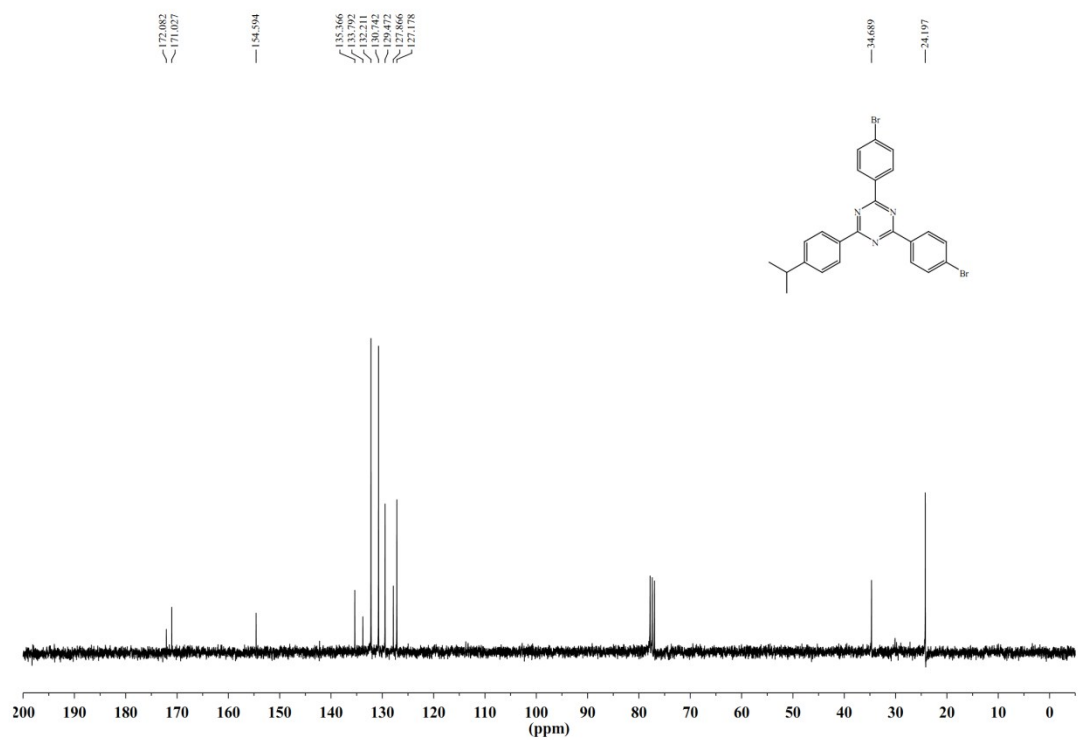

3lc



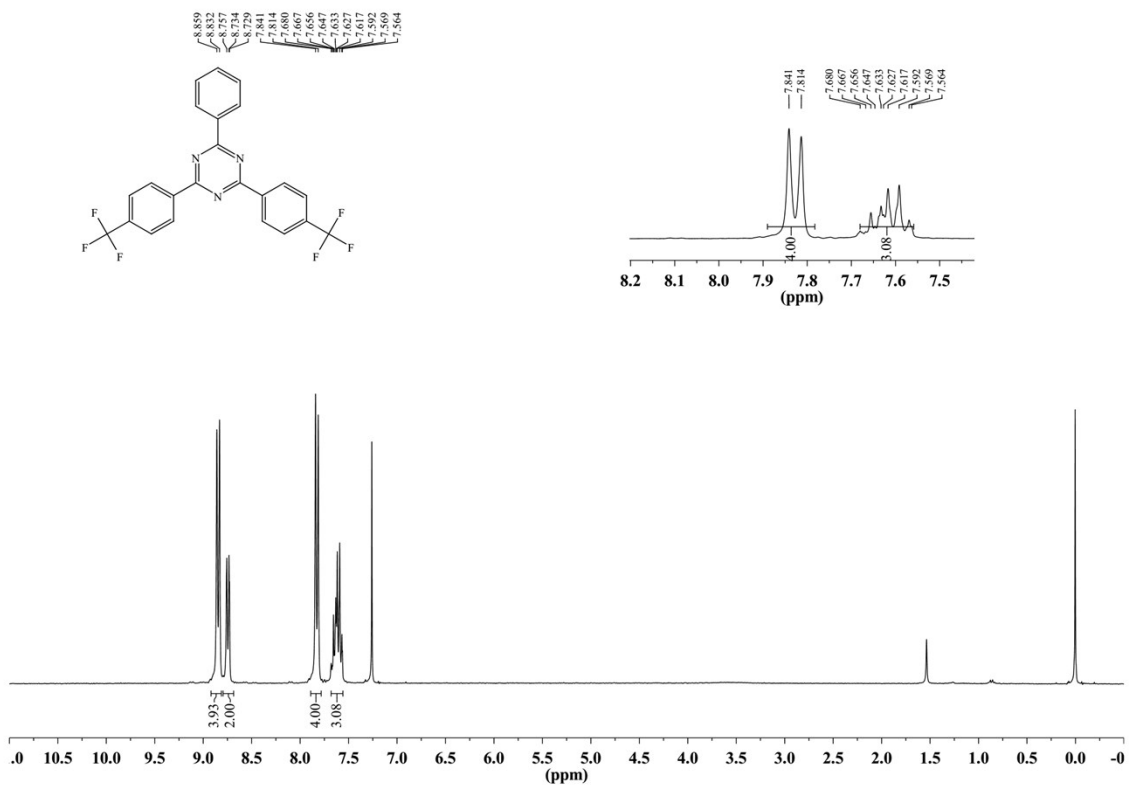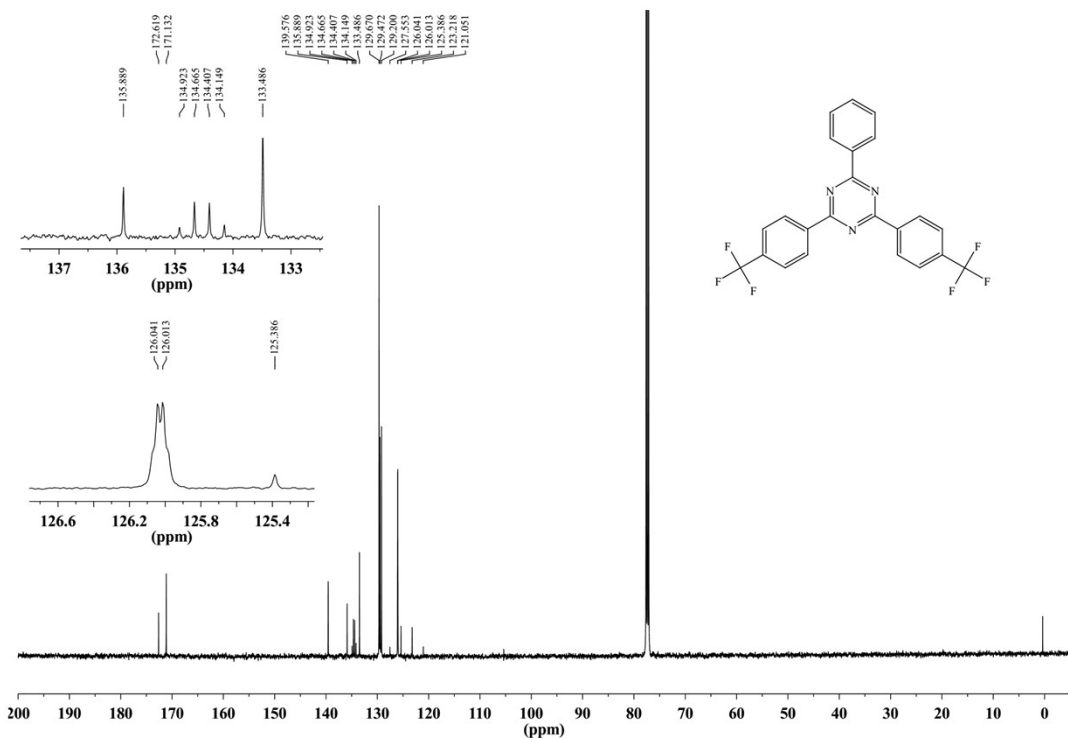

3ad

S33

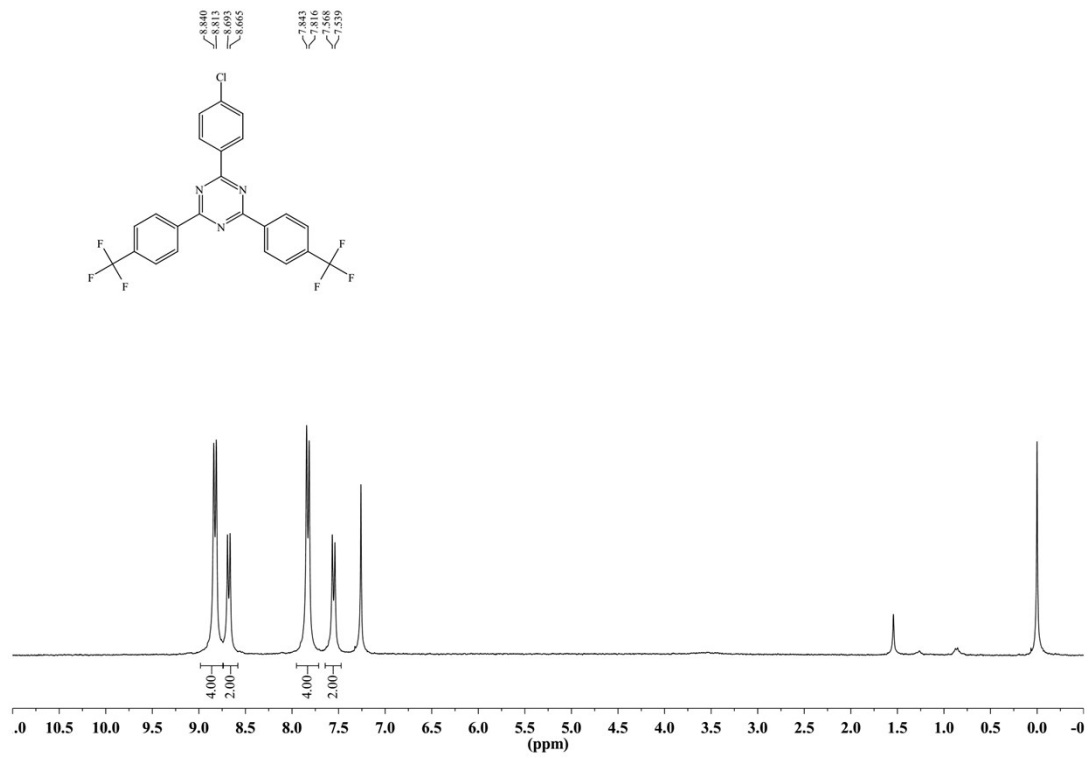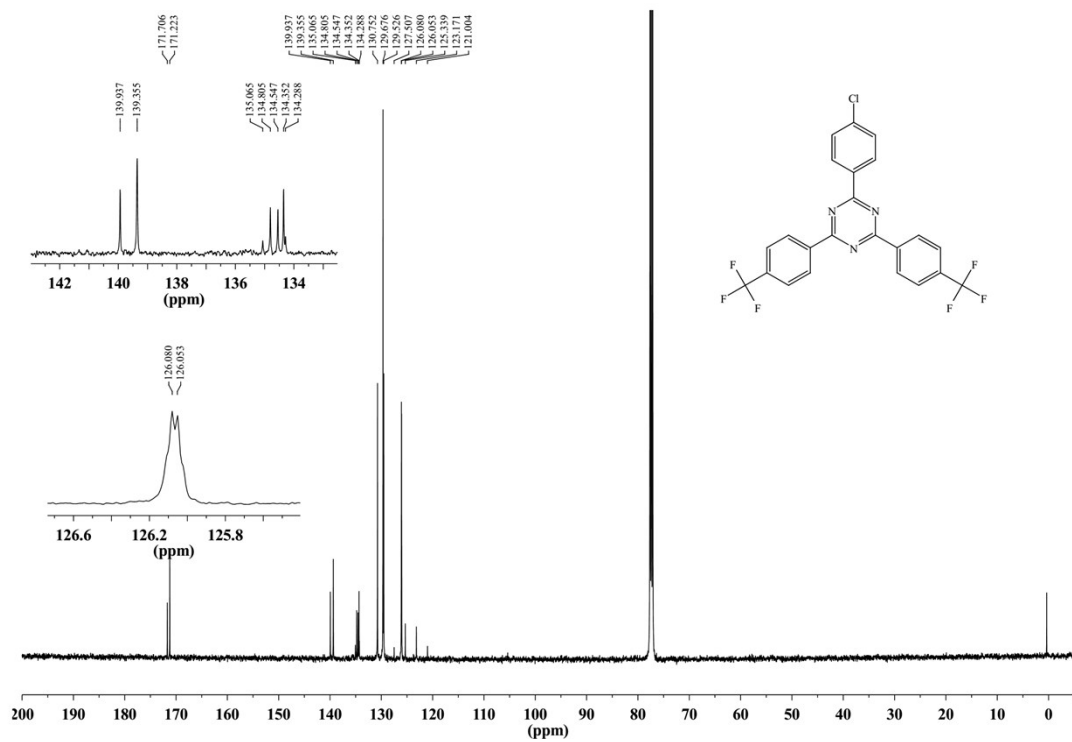

3bd

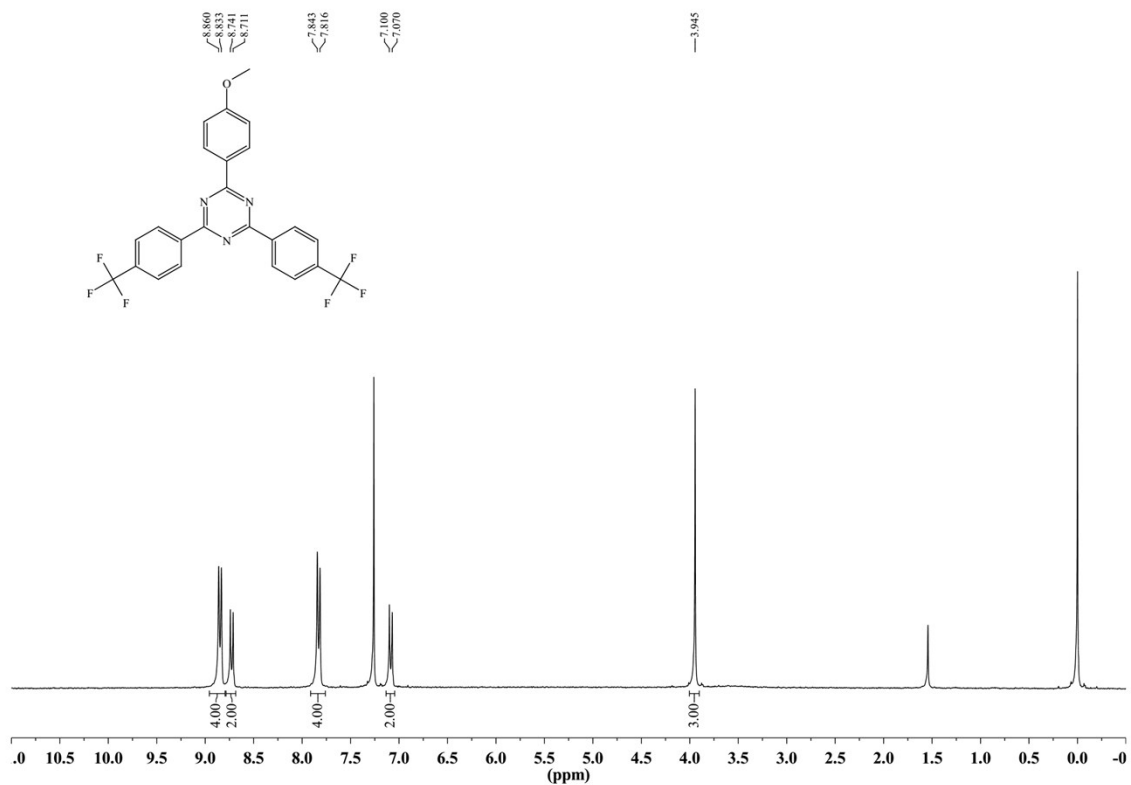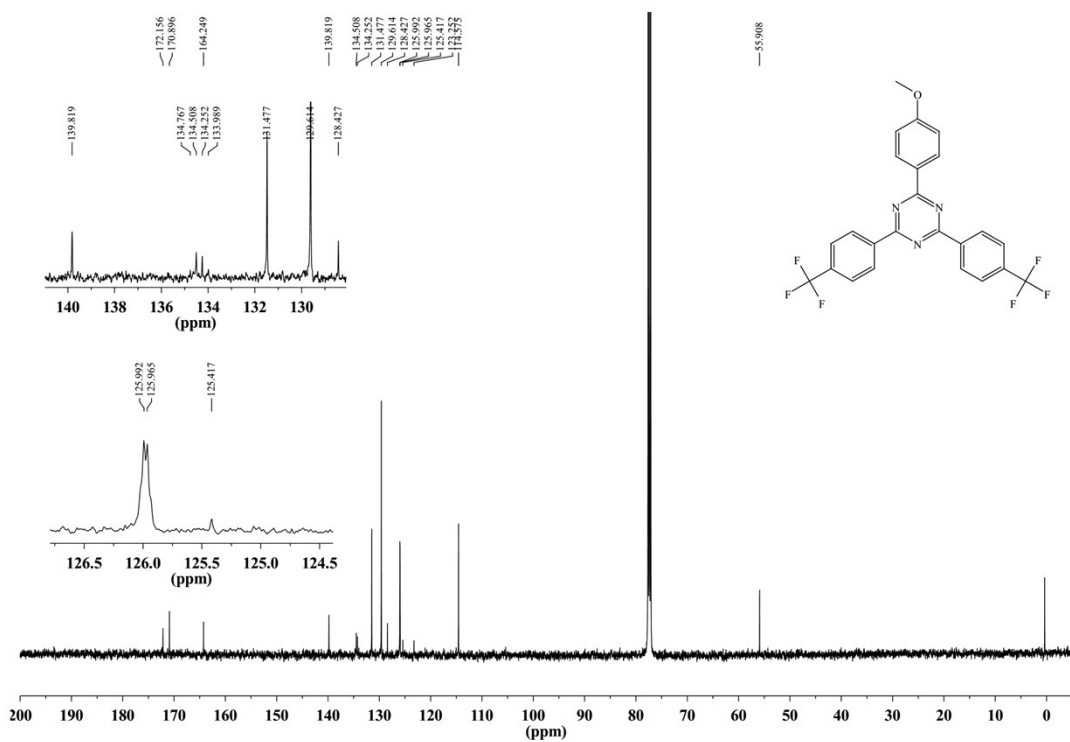

3id

S35

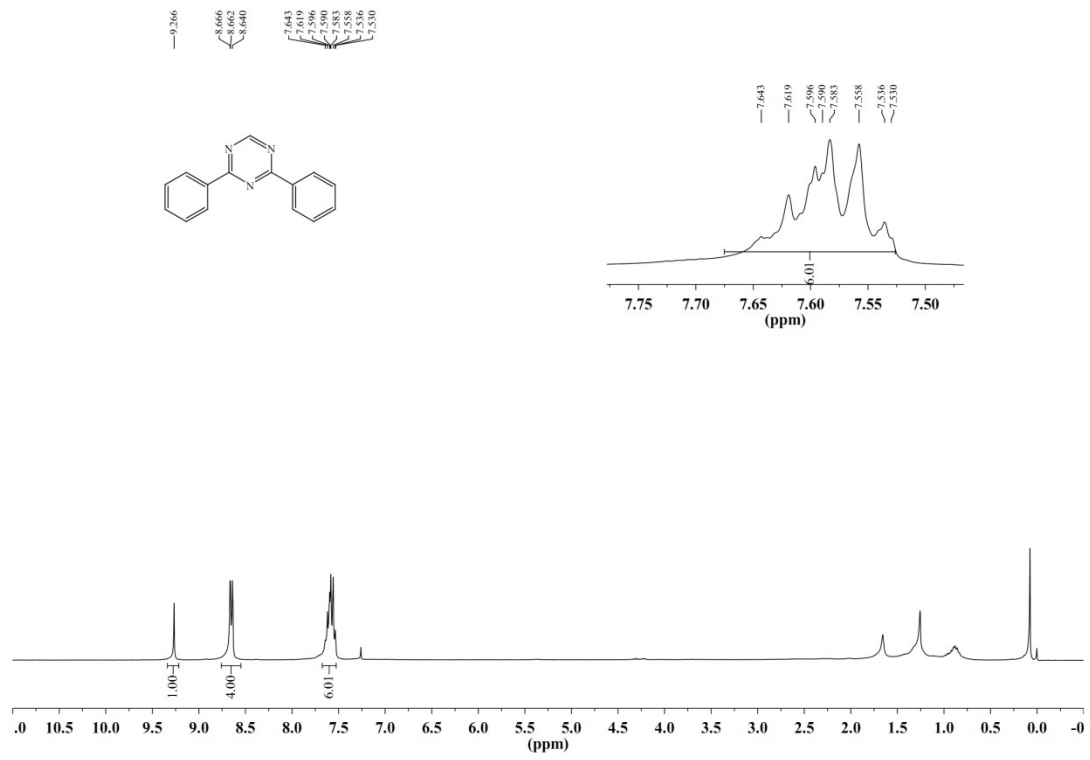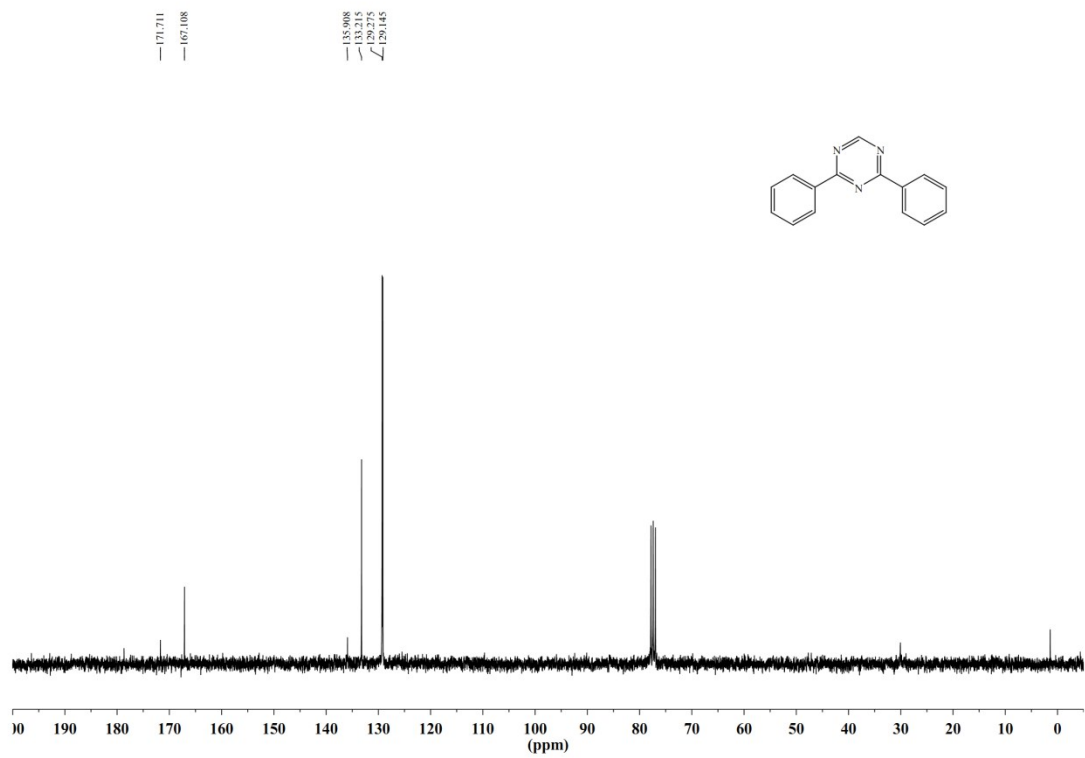

3qa

S36

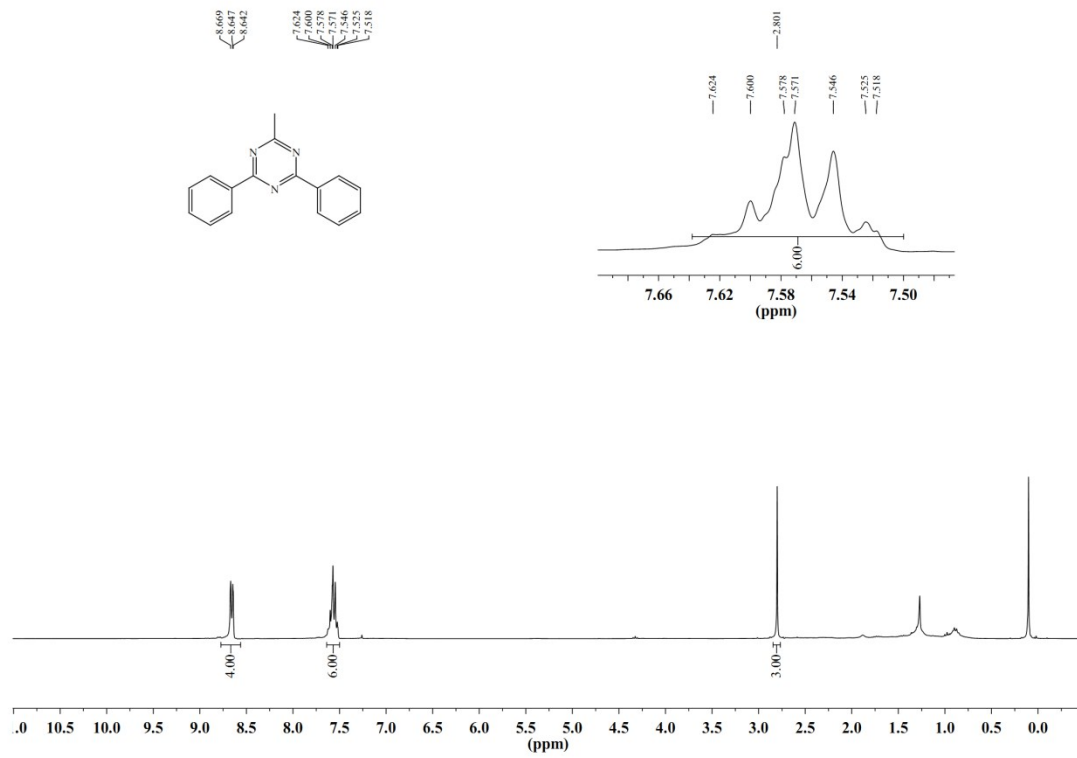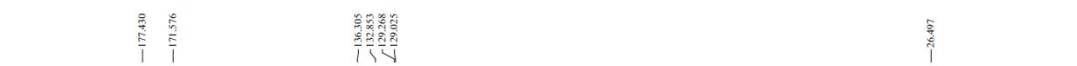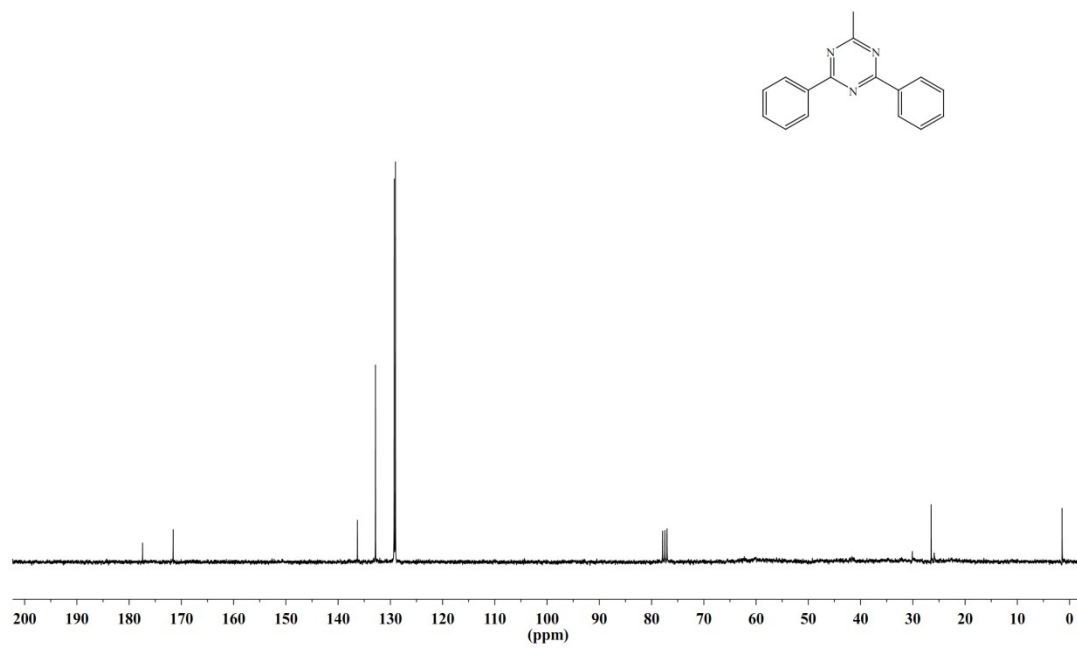

3ra

S37

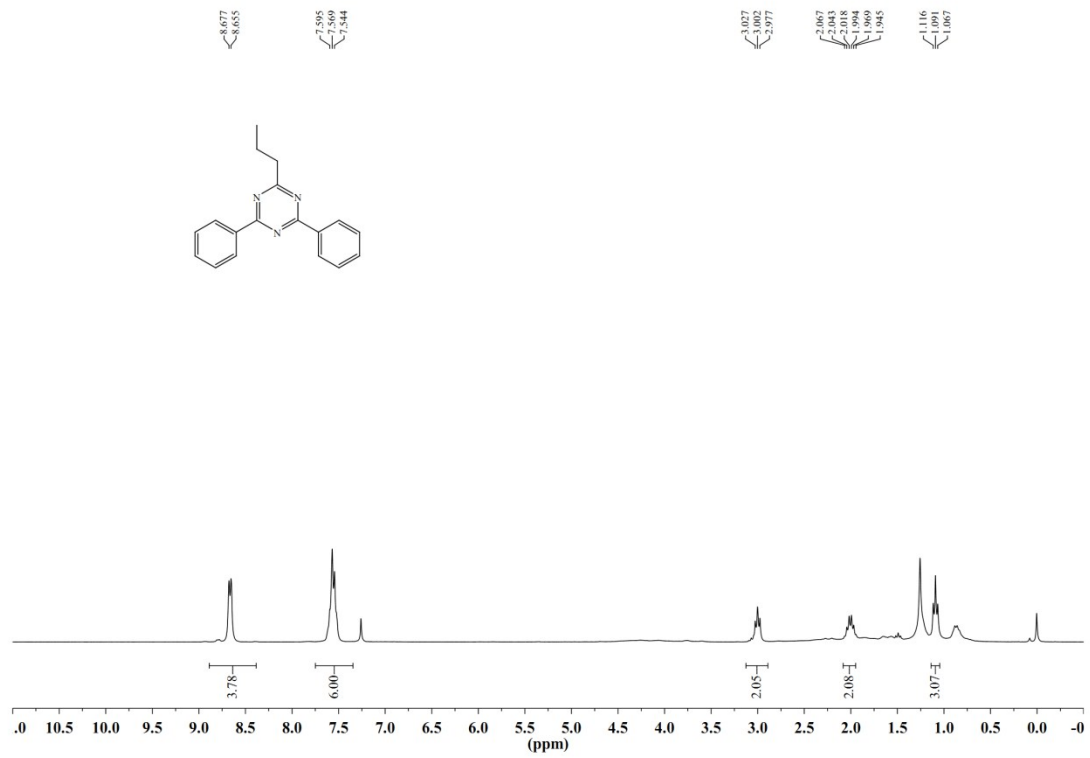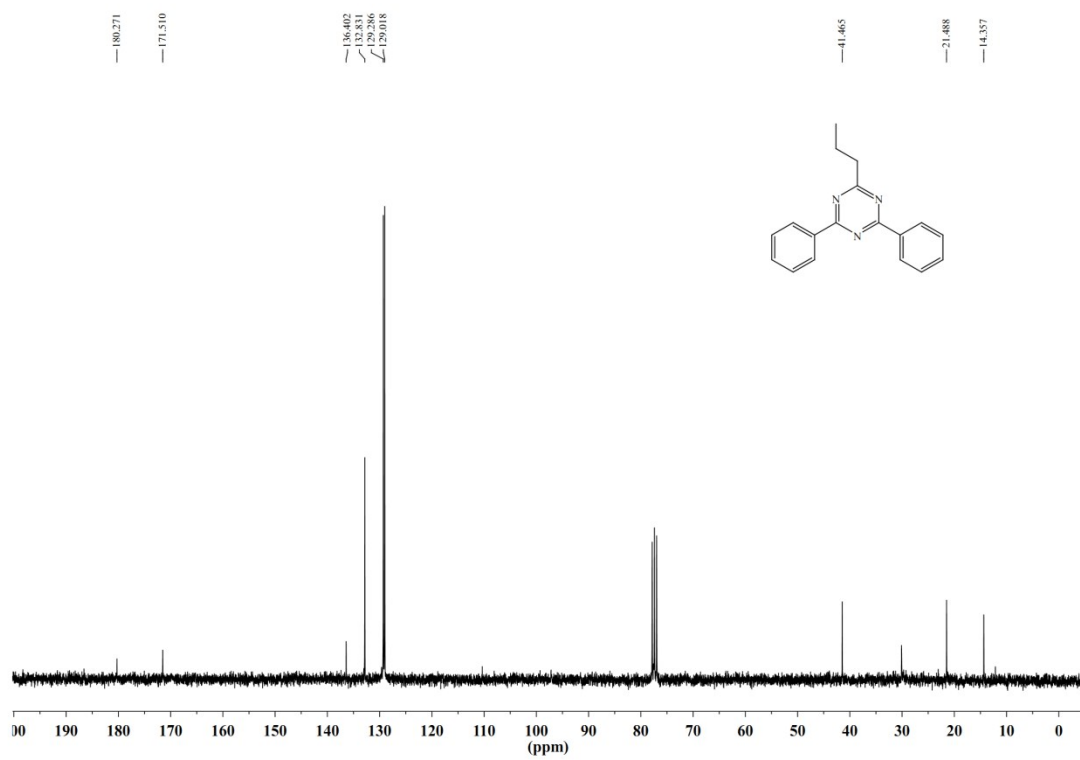

3a

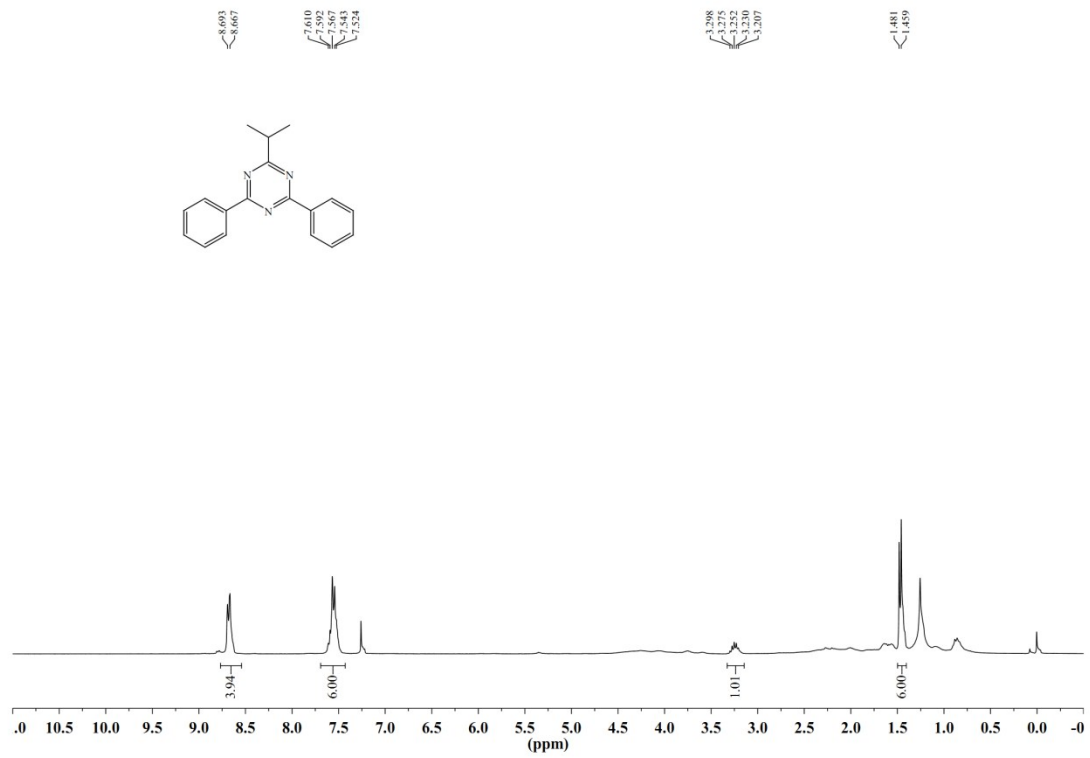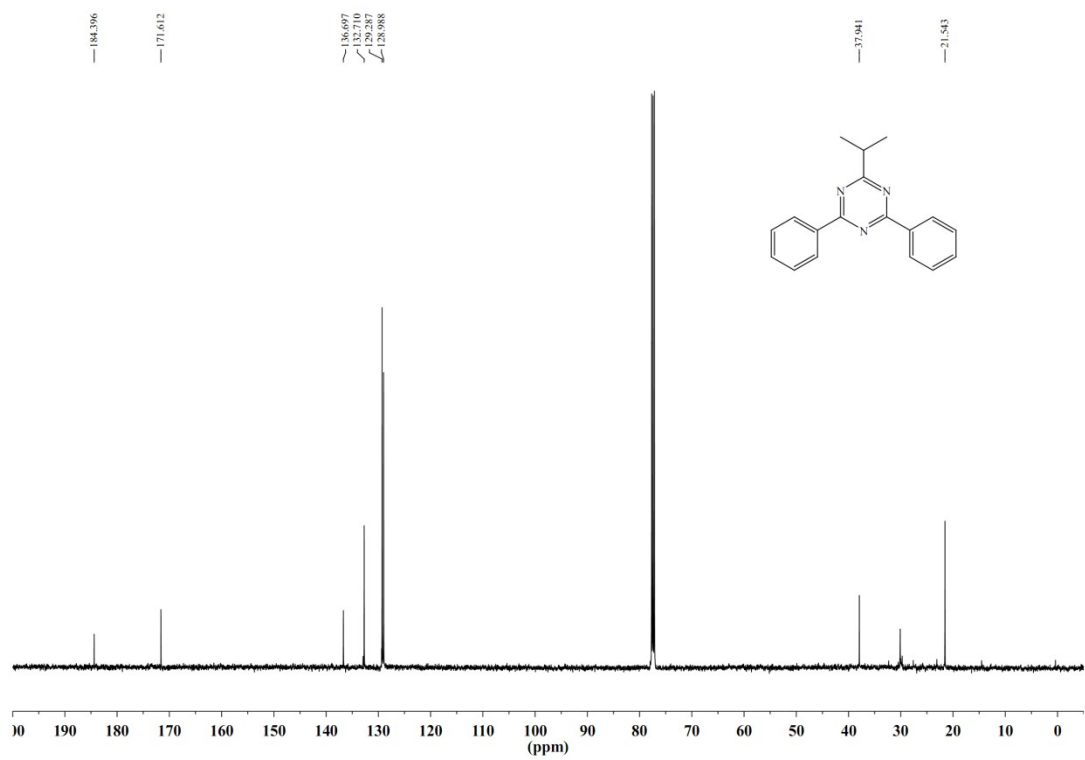

3ta

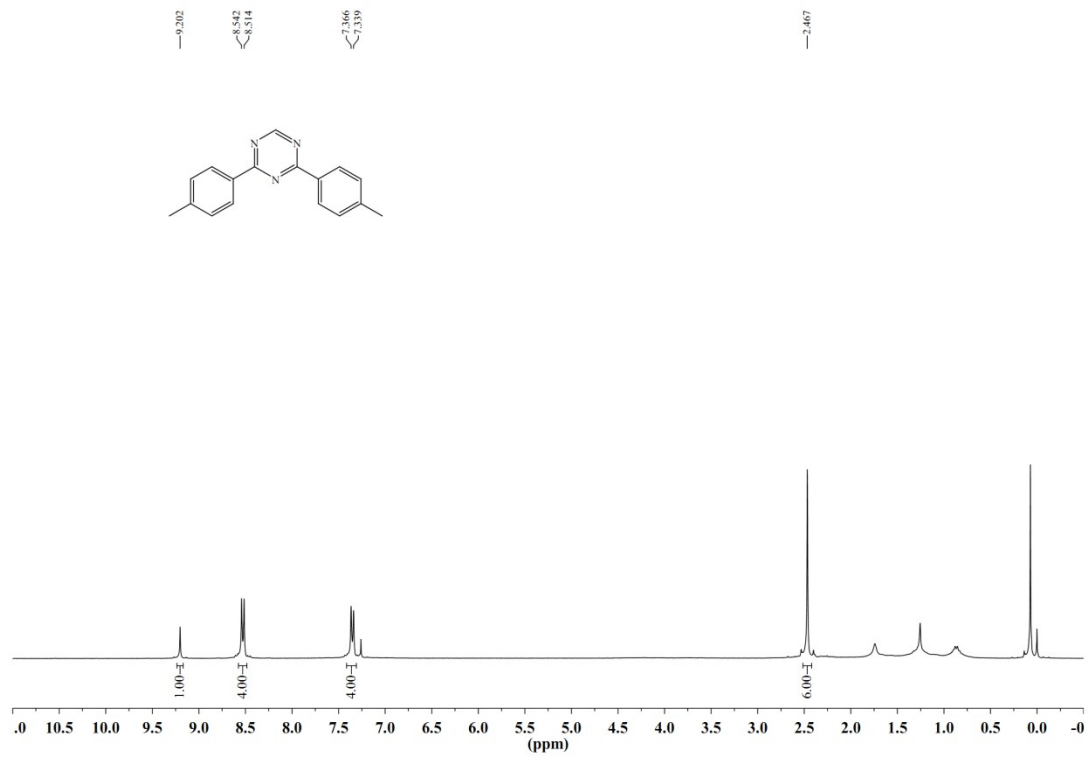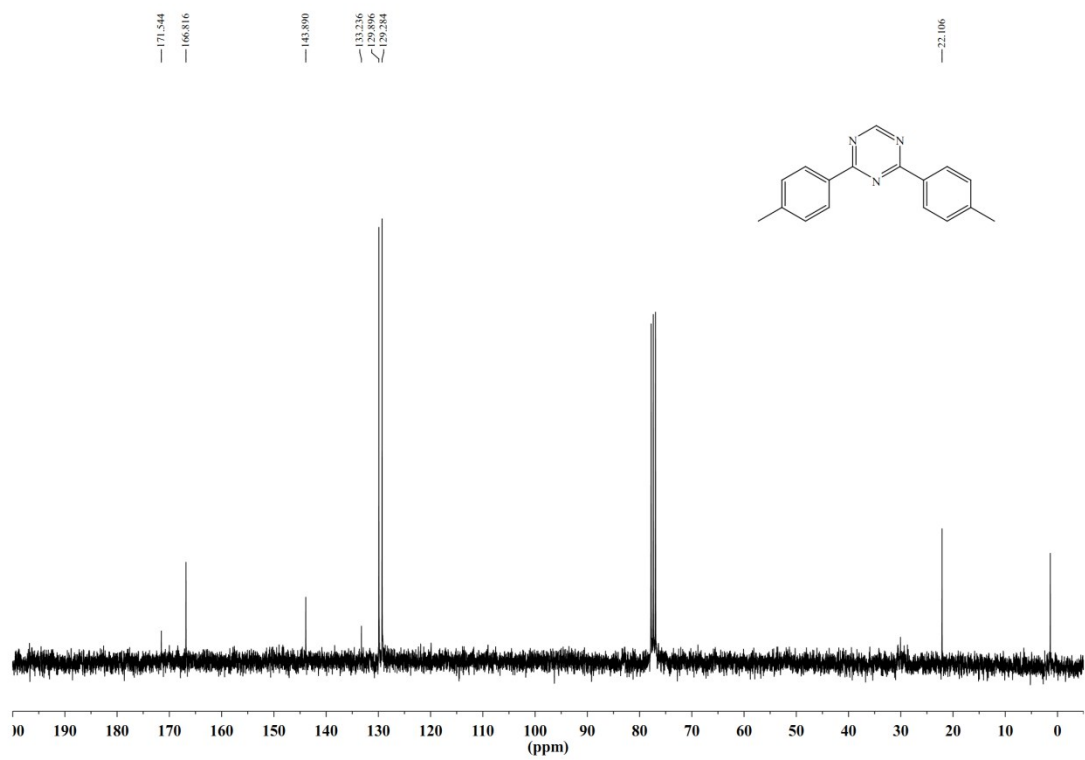

3qb

S40



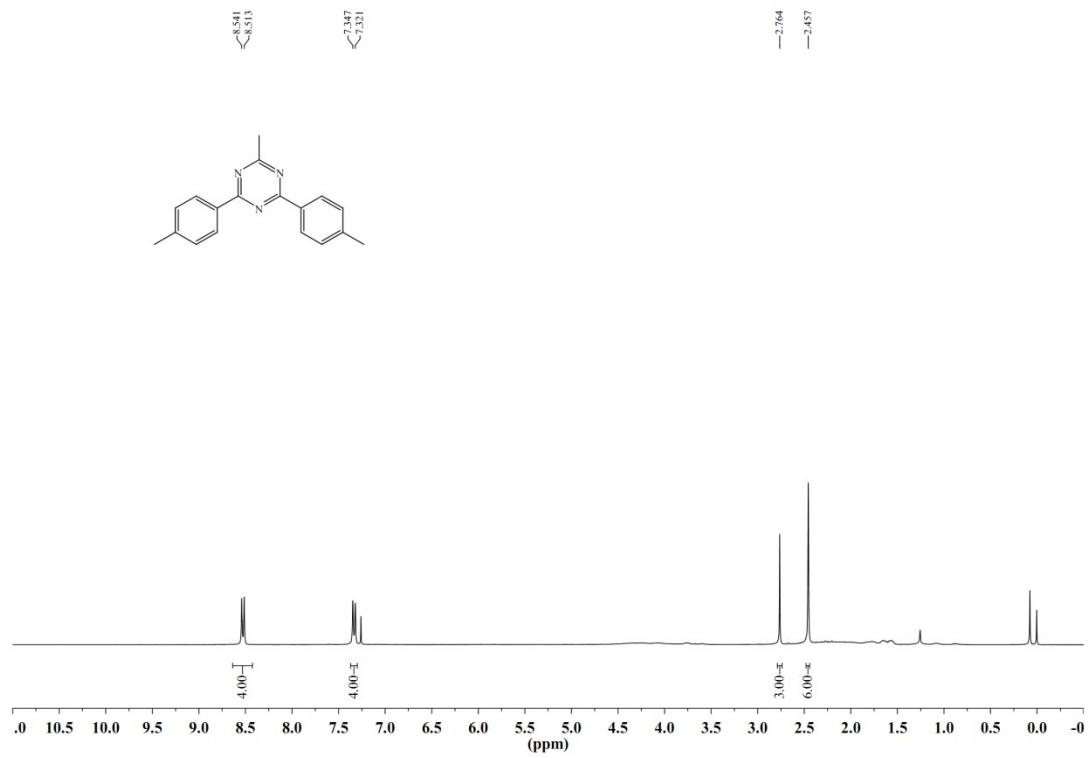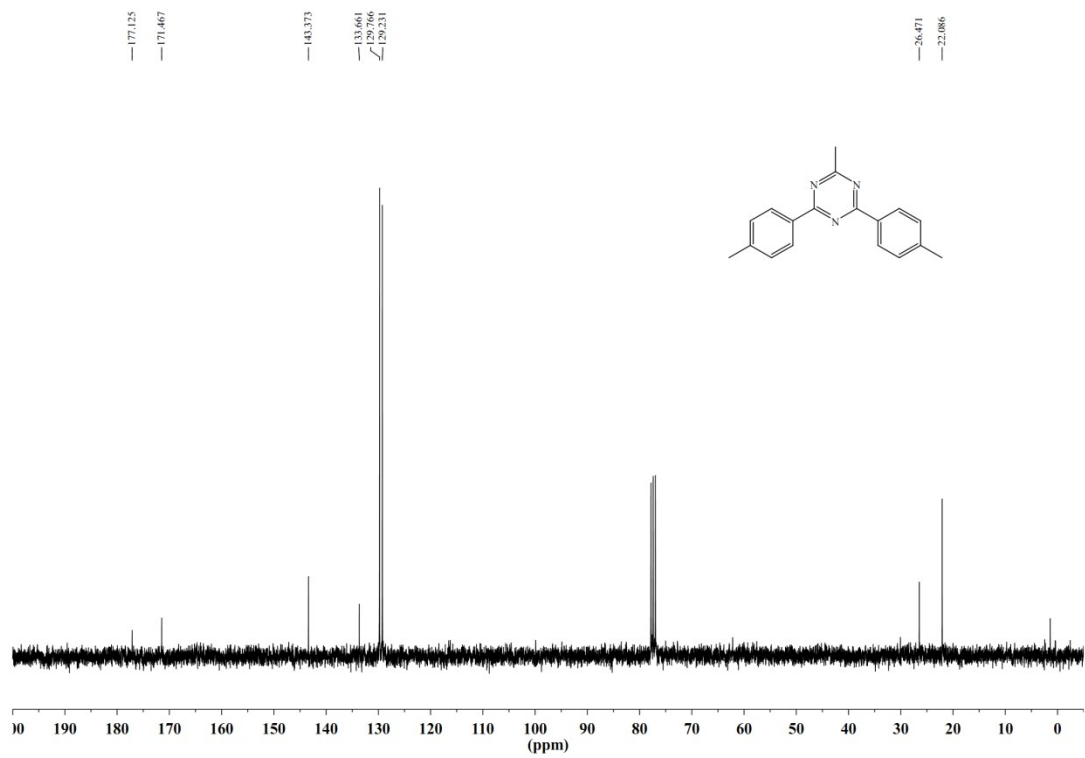

3rb

S41

- (1) F. Xie, M. M. Chen, X. T. Wang, H. F. Jiang and M. Zhang, *Org. Biomol.Chem*, 2014, **12**, 2761-2768.
- (2) S. Mataka, A. Hosoki and M. Tashiro, *J. Heterocyclic Chem*, 1980, **17**, 1681-1685.
- (3) Y. C. Kong, K. Kim and Y. J. Park, *Tetrahedron*, 2000, **56**, 7153-7161.
- (4) S. Biswas and S. Batra, *Eur. J. Org. Chem*, 2012, **18**, 3492-3499.
- (5) K. Maeda and T. Hayashi, *Bulletin of the Chemical Society of Japan*, 1971, **44**, 533-536.
- (6) L. L. Whitfield and E. P. Papadopoulos, *J. Heterocyclic Chem*, 1981, **18**, 1197-1201.
- (7) X. Chen, S. D. Bai, L. Wang and D. S. Liu, *Heterocycles*, 2005, **65**, 1425-1430.
- (8) V. S. Brovarets, A. V. Golovenko and K. B. Zyuz, *Russian Journal of General Chemistry*, 2004, **74**, 1328-1334.
- (9) V. M. Cherkasov, N. A. Kapran, V. N. Zavatskii and V. T Tsyba, *Chemistry of Heterocyclic Compounds*, 1971, **7**, 662-664.
